# Supplementary material
Source: Royal Society of Chemistry journal article supplement (doi:10.1039/d6cp00140h)
Supplement: d6cp00140h1.pdf [file d6cp00140h1.pdf]

Supporting Information for:

# Orientation of interfacial water molecules governs the electrochemical nitrogen reduction reaction on the Mo-N<sub>4</sub>-C surface

Deewan S. Teja and Bhabani S. Mallik\*

Department of Chemistry, Indian Institute of Technology Hyderabad, Sangareddy-502284, Telangana, India

Corresponding author: [bhabani@chy.iith.ac.in](mailto:bhabani@chy.iith.ac.in)

---

## Table of contents

| Appendix S(referred as S1, S2,S3.....)                                                                                                                                                                                           | Page No |
|----------------------------------------------------------------------------------------------------------------------------------------------------------------------------------------------------------------------------------|---------|
| <b>1. Additional Computational Details</b>                                                                                                                                                                                       |         |
| 1.1. DFT Calculation                                                                                                                                                                                                             | S4      |
| 1.2. Representation of Electrolyte Model                                                                                                                                                                                         | S4      |
| 1.3. Reaction pulling speed and Potential control                                                                                                                                                                                | S4      |
| 1.4. Selection of CV for Calculation of *H and *NH <sub>2</sub> barrier                                                                                                                                                          | S5      |
| <b>2. Supplementary Figures</b>                                                                                                                                                                                                  |         |
| Figure S1. The representative structure of the MoN <sub>4</sub> /H <sub>2</sub> O electrode-electrolyte interface with the radial distribution function (RDF) of equilibrated water, with integration of g(r) of the O-H and O-O | S6      |
| Figure S2. The end-on and side-on N <sub>2</sub> adsorption at the MoN <sub>4</sub> interface, with its charge density plot                                                                                                      | S6      |
| Figure S3. The free energy profile of Enzymatic mechanism at the MoN <sub>4</sub> /H <sub>2</sub> O interface in acidic medium at pH = 1, with optimized NRR intermediates.                                                      | S7      |
| Figure S4. The simulation box of the MoN <sub>4</sub> /H <sub>2</sub> O interface with 40 water molecules, with Helium, and a change in the Mo-N bond length during simulation                                                   | S7      |
| Figure S5. The equilibrated temperature and energy plot of the AIMD at (a) 0 V, (b) -0.2 V, and (c) -0.4 V vs RHE                                                                                                                | S8      |
| Figure S6. (a) The H density along the surface (z-axis), (b) The Probability distribution of the H-O-H angle of water at 0, -0.2, and -0.4 V vs RHE                                                                              | S8      |
| Figure S7. (a-l) The selective snapshot of the H <sub>3</sub> O <sup>+</sup> diffusion at 0 V vs RHE in acidic medium                                                                                                            | S8      |
| Figure S8. (a-l) The selective snapshot of the H <sub>3</sub> O <sup>+</sup> diffusion at -0.2 V vs RHE in acidic medium                                                                                                         | S9      |
| Figure S9. (a-l) The selective snapshot of the H <sub>3</sub> O <sup>+</sup> diffusion at -0.4 V vs RHE in acidic medium                                                                                                         | S10     |

- Figure S10. (a) The projected density of states (PDOS) and (b) ICOHP plot of the free N<sub>2</sub> molecule S11
- Figure S11. The Orbital-wise PDOS analysis of the \*N<sub>2</sub> with Metal (Mo) in end-on configuration at (a) 0 V, (b) -0.2 V, and (c) -0.4 V vs RHE S11
- Figure S12. (a) The snapshots of the collective variable for the slow growth for (a) \*NH<sub>2</sub> protonation, (b) \*N<sub>2</sub> adsorption, and (c) \*H adsorption at 0, -0.2, and -0.4 V vs RHE in acidic medium with pH=1 on MoN<sub>4</sub>/H<sub>2</sub>O interface S12
- Figure S13. The reaction barrier for \*NH<sub>2</sub> protonation at 0 V with (a) pulling speed of 0.0004 Å/time step, (b) with pulling speed of 0.0006 Å/time step, and (c) with pulling speed of 0.0008 Å/time step with pH=1 on the MoN<sub>4</sub>/H<sub>2</sub>O interface. S12
- Figure S14. The three independent simulations of the \*NH<sub>2</sub> to \*NH<sub>3</sub> formation at 0 V, (a) first simulation (provided in main manuscript), (b) second simulation, (c) third simulation. S12
- Figure S15. (a) The different initial configuration for the \*NH<sub>2</sub> to \*NH<sub>3</sub> formation at 0 V, (b) Free energy profiles and the corresponding forces during enhanced sampling along the reaction coordinate. S13
- Figure S16. The change in the N-H and O-H bond length with time at applied potential of (a) 0 V, (b) -0.2 V, and (c) -0.4 V vs RHE in acidic medium at MoN<sub>4</sub>/H<sub>2</sub>O interface S13
- Figure S17. The evolution of the target potential during SG-AIMD simulation of the \*NH<sub>2</sub> to \*NH<sub>3</sub> formation at (a) 0, (b) -0.2, and (c) -0.4 V vs RHE. S13
- Figure S18. (a) The pCOHP plot of the N<sub>2</sub> adsorption at 1.5 ps with applied potential of -0.2 V vs RHE. (b) The pCOHP plot of the N<sub>2</sub> adsorption at 1.5 ps with applied potential of -0.4 V vs RHE S14
- Figure S19. The change in the Mo-N<sub>2</sub> and N<sub>1</sub>-N<sub>2</sub> bond length, during the slow growth simulation, with a selective snapshot of \*N<sub>2</sub> adsorption at (a) -0.2 V and (b) -0.4 V S14
- Figure S20. The evolution of the target potential during SG-AIMD simulation of the \*N<sub>2</sub> adsorption at (a) 0, (b) -0.2, and (c) -0.4 V vs RHE. S15
- Figure S21. The labeled snapshot at 0 V extract from SG-AIMD simulation for the \*H adsorption, at ~0.650 ps, at ~1.220 ps, with the change in the O-H and Mo-H bond length during the PT S15
- Figure S22. (a) The labeled snapshot at 0 ps extract from SG-AIMD simulation for the \*H adsorption, at ~0.650 ps, at ~1.952 ps, and ~3.20 ps with the change in the O-H and Mo-H bond length during the PT at ~3.10 ps, applied potential of -0.2 V vs RHE S16
- Figure S23. (a) The labeled snapshot at 0 ps extract from SG-AIMD simulation for the \*H adsorption, at ~1.597 ps, at ~1.610 ps, and at ~3.20 ps with the change in the O-H and Mo-H bond length at -0.4 V vs RHE S17
- Figure S24. The evolution of the target potential during SG-AIMD simulation of the \*H adsorption at (a) 0, (b) -0.2, and (c) -0.4 V vs RHE S17

### 3. Supplementary Tables

Table 1. The MN<sub>4</sub> and MN<sub>3</sub> systems with a range of applied potential and reaction medium were studied through experimental and computational techniques in a literature study. S18

Table 2. The charge fluctuation at 0 V vs RHE, in different time steps during the SG-AIMD simulation on \*NH<sub>2</sub> adsorption S18

|                                                                                                                                       |     |
|---------------------------------------------------------------------------------------------------------------------------------------|-----|
| Table 3. The charge fluctuation at -0.2 V vs RHE in different time steps during the SG-AIMD simulation on *NH <sub>2</sub> adsorption | S19 |
| Table 4. The charge fluctuation at -0.4 V vs RHE in different time steps during the SG-AIMD simulation on *NH <sub>2</sub> adsorption | S19 |
| Table 5. The charge fluctuation at 0 V vs RHE in different time steps during the SG-AIMD simulation on *N <sub>2</sub> adsorption     | S19 |
| Table 6. The charge fluctuation at -0.2 V vs RHE in different time steps during the SG-AIMD simulation on *N <sub>2</sub> adsorption  | S20 |
| Table 7. The charge fluctuation at -0.4 V vs RHE in different time steps during the SG-AIMD simulation on *N <sub>2</sub> adsorption  | S20 |
| Table 8. The charge fluctuation at 0 V vs RHE, different time steps during the SG-AIMD simulation on *H adsorption                    | S20 |
| Table 9. The charge fluctuation at -0.2 V vs RHE, different time steps during the SG-AIMD simulation on *H adsorption                 | S21 |
| Table 10. The charge fluctuation at -0.4 V vs RHE, different time steps during the SG-AIMD simulation on *H adsorption                | S21 |

|                                                                                  |        |
|----------------------------------------------------------------------------------|--------|
| <b>4. Video files of all the studied reaction pathways</b>                       | online |
| <b>5. References</b>                                                             | S22    |
| <b>6. Coordinates and the input files used for the AIMD, and slow simulation</b> | S22    |

## **1. Additional Computational details**

### **1.1 DFT Calculations**

A hybrid solvation model was taken, where implicit solvation was applied through VASPsol using the Poisson-Boltzmann implicit solvation model with the dielectric constant ( $\epsilon$ ) of 78.4 (water).<sup>1</sup> In addition, the explicit solvation model is applied by taking the atomic water near the adsorbate species to capture the influence of an electric double layer.<sup>2</sup> The MoN<sub>4</sub> surface was modeled using a supercell of  $4 \times 3 \times 1$  with optimized box cell lengths of  $a = 9.824$ ,  $b = 12.762$ , and  $c = 25$  Å. A Monkhorst-Pack k-point mesh was  $3 \times 3 \times 1$ , with  $\sim 15$  Å vacuum added in the  $z$ -axis.<sup>3</sup> Initially, a CHE model<sup>4</sup> was applied to study the PDS of the N<sub>2</sub> reduction on the MoN<sub>4</sub> catalyst surface. According to this model, the free energy change ( $\Delta G$ ) of each electrochemical step was calculated by the given eq 1

$$\Delta G = \Delta E + \Delta E_{ZPE} - T\Delta S + \Delta G_U + \Delta G_{pH} \quad (1)$$

Here,  $\Delta E$  represents the DFT calculated total energy,  $\Delta E_{ZPE}$  (zero-point energy) and  $S$  (entropy), calculated by employing the frequency calculation at a temperature ( $T$ ) of 298.15 K. The  $\Delta G_U$  represents the applied potential, which is further elaborated as  $\Delta G_U = -neU$ , where  $U$  is the applied potential and  $n$  is the number of electrons transferred. The  $\Delta G_{pH}$  denotes the  $pH$  correction applied through the eq 2.

$$\Delta G_{pH} = k_B T \times pH \times \ln 10 \quad (2)$$

where  $k_B$  is the Boltzmann constant, and  $pH$  is set to 1. The limiting potential of reaction ( $U_L$ ) is termed as the minimum applied potential to the system at which each reaction step shows thermodynamic feasibility, determined by eq 3.

$$U_L = \frac{-\Delta G_{PDS}}{e} \quad (3)$$

Here,  $\Delta G_{PDS}$  is the free energy change of the PDS step, and it is the maximum  $\Delta G$  throughout the reaction step.

## 1.2 Representation of Electrolyte model

In our simulations, we used one H<sub>3</sub>O<sup>+</sup> molecule with 40 water molecules to represent an acidic environment. This setup is intended to capture proton availability and proton transfer behaviour at the electrified interface, rather than reproduce the exact bulk pH quantitatively. However, the counterion was not explicitly included due to considerations of the electric double-layer (EDL) effect. According to classical electrochemical theory, under an applied potential, ionic species become spatially separated, where ions of one specific charge preferentially accumulate near the electrode surface, while their counterions are redistributed away from the Helmholtz plane due to electrostatic repulsion.<sup>5</sup> Consequently, neglecting the counterion allows the simulations to focus on the chemically relevant interfacial region. This approximation has been commonly adopted in previous studies.<sup>6-8</sup> Similarly, we clarify that the Debye length of 3.04 Å was employed within the VASPsol framework to provide continuum electrostatic screening of the surrounding electrolyte. This parameter does not correspond to an exact

bulk concentration in our finite simulation cell (1.3 M), but approximates long-range screening beyond the explicitly modelled solvent layer.

### 1.3 Reaction pulling speed and potential control

In addition, the pulling speed (the incremental change of the collective variable per MD step) employed in the SG-AIMD plays a critical role in determining the smoothness and quality of the slow growth barrier. A large pulling speed can lead to nonequilibrium effects and an uneven free-energy curve, whereas a sufficiently slow pulling speed ensures better convergence and a smoother barrier. Therefore, we employed a pulling speed of  $0.0004 \text{ \AA}/\text{time step}$ , which is sufficiently slow to minimize nonequilibrium artifacts and yield a well-converged, smooth free-energy profile. In addition, a test of different pulling speeds is provided in Figure S13, demonstrate the barrier is relatively smooth and lower as compared to  $0.0006$  and  $0.0008 \text{ \AA}/\text{time step}$ .

In our constant-potential simulations, the number of electrons is adjusted periodically to maintain the desired electrode potential through  $\text{NEADJUST} = 5$ , meaning the potential is updated every five MD steps. Therefore, the x-axis represents the update index, which corresponds to the number of potential adjustment events during the simulation, as shown in Figures S17, S20, and S24.

### 1.4 Selection of CV for Calculation of \*H and \*NH<sub>2</sub> barrier

The selection of the CV for \*H and \*NH<sub>2</sub> based on the two aspects: (I) the water spontaneously adsorbs on the MoN<sub>4</sub> site during equilibration. This reflects the intrinsic oxyphilic nature of the Mo center under aqueous conditions and represents the thermodynamically preferred state. Therefore, pre-adsorbed water taken as CV (initial state) for calculating the \*H adsorption reaction barrier, as shown in Figure S11c. But, when the Mo site is pre-occupied by some other species like \*NH<sub>2</sub> and \*N<sub>2</sub>, the site is blocked for the incoming H<sub>2</sub>O molecule. In other words, the presence or absence of \*H<sub>2</sub>O is not imposed manually but emerges naturally from competitive adsorption thermodynamics configuration under adsorbate coverage. Therefore, both HER and NRR pathways were evaluated from their respective thermodynamically stable surface configurations. Introducing a manually fixed \*H<sub>2</sub>O species during NRR steps would artificially constrain the system and disrupt the spontaneous competitive adsorption behaviour. Another aspect is that (II) This adsorption competition leads to a lower \*H barrier than the \*NH<sub>2</sub> protonation, indicating that the indicating that HER is kinetically more favorable than NRR on MoN<sub>4</sub>. This intrinsic oxophilic nature and the resulting preference toward \*H formation may partially account for the limited experimental reports of Mo on N-doped graphene for selective NRR.

## 2. Supplementary Figures

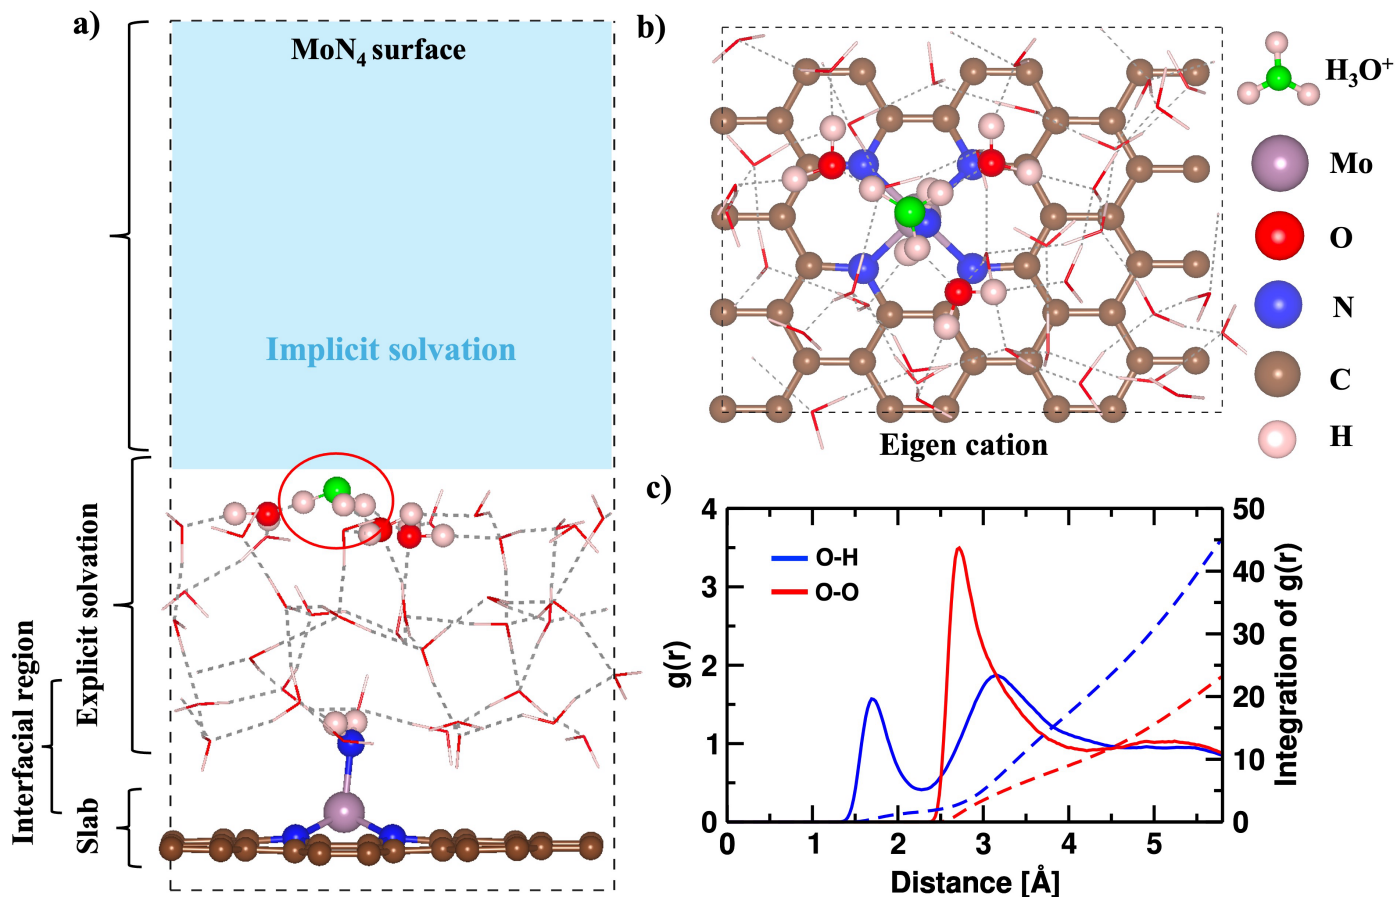

**Figure S1.** (a) The representative structure of the MoN<sub>4</sub>/H<sub>2</sub>O electrode-electrolyte interface, where H<sub>3</sub>O<sup>+</sup> represents the acidic medium (green color). (b) The present H<sub>3</sub>O<sup>+</sup> makes a solvation shell with 3 H<sub>2</sub>O, termed the Eigen cation (H<sub>9</sub>O<sub>4</sub><sup>+</sup>). (c) The radial distribution function (RDF) of equilibrated water with integration of g(r) of the O-H and O-O.

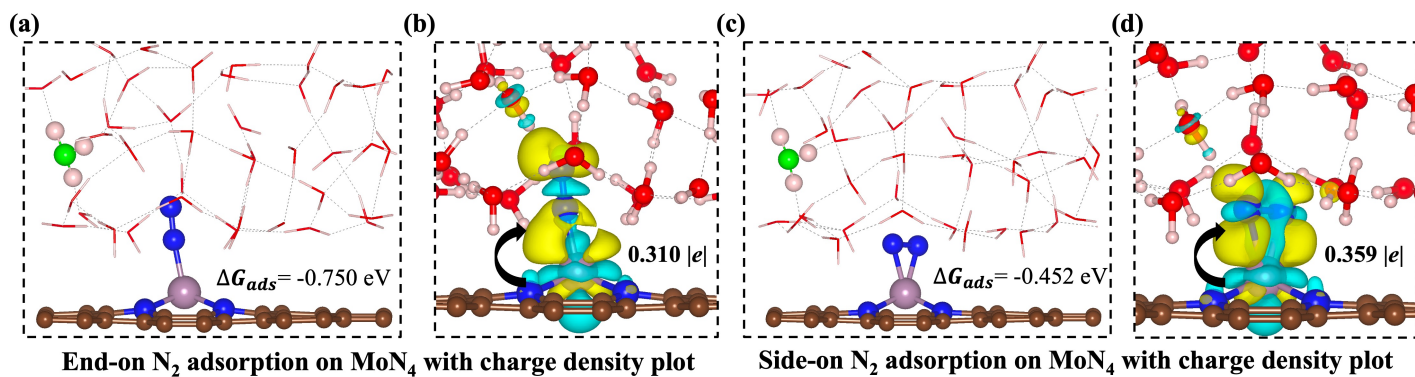

**Figure S2.** (a-b) The end-on N<sub>2</sub> adsorption at the MoN<sub>4</sub>/H<sub>2</sub>O interface, along with its charge density plot. (c-d) The side-on N<sub>2</sub> adsorption at the MoN<sub>4</sub>/H<sub>2</sub>O interface, along with its charge density plot in acidic medium with an isosurface value of 0.0003 e Å<sup>-3</sup>. The yellow region shows charge accumulation, and the cyan region shows charge depletion.

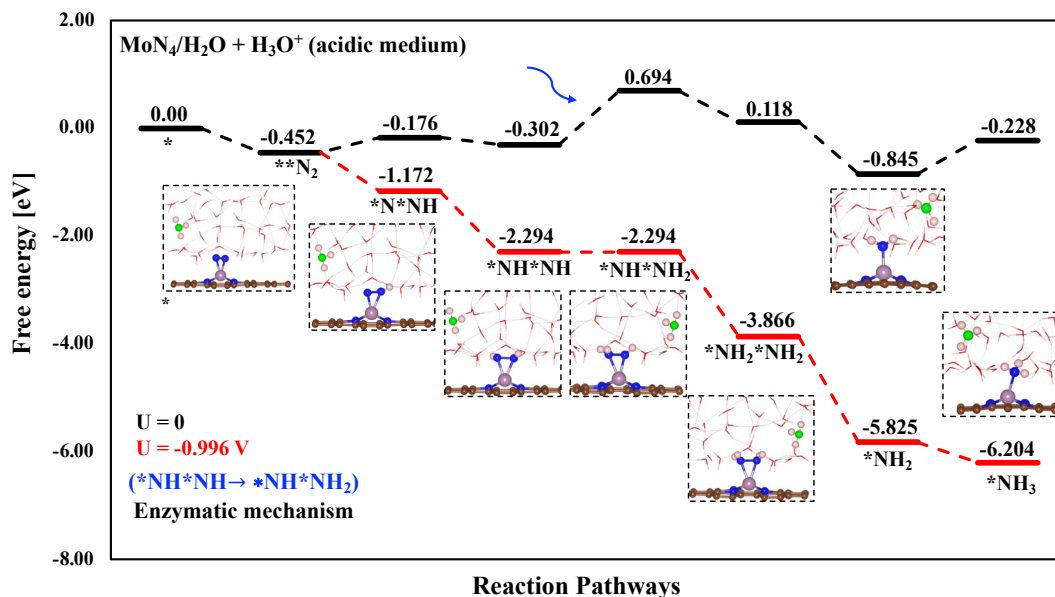

**Figure S3.** The free energy profile of Enzymatic mechanism at the  $\text{MoN}_4/\text{H}_2\text{O}$  interface in acidic medium, with optimized NRR intermediates.

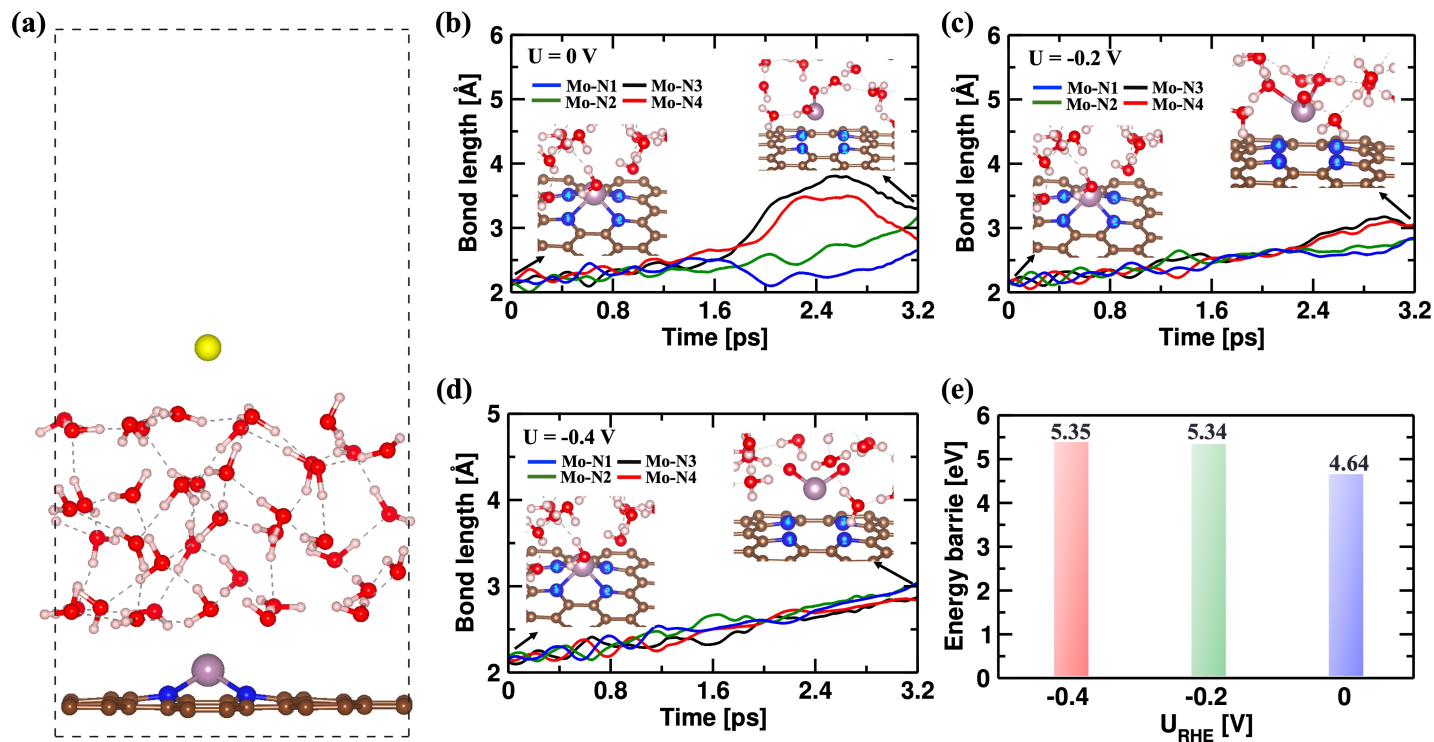

**Figure S4.** (a) The simulation box of the  $\text{MoN}_4/\text{H}_2\text{O}$  interface with 40 water molecules, where Helium is represented in the yellow colour, (b-d) The change in the Mo-N bond length at potential of 0, -0.2, and -0.4 V vs RHE, during the leaching of the Mo, extracted from SG-AIMD simulation (e) The reaction of the Mo leaching from the N-doped graphene surface ( $\text{N}_4\text{G}$ ).

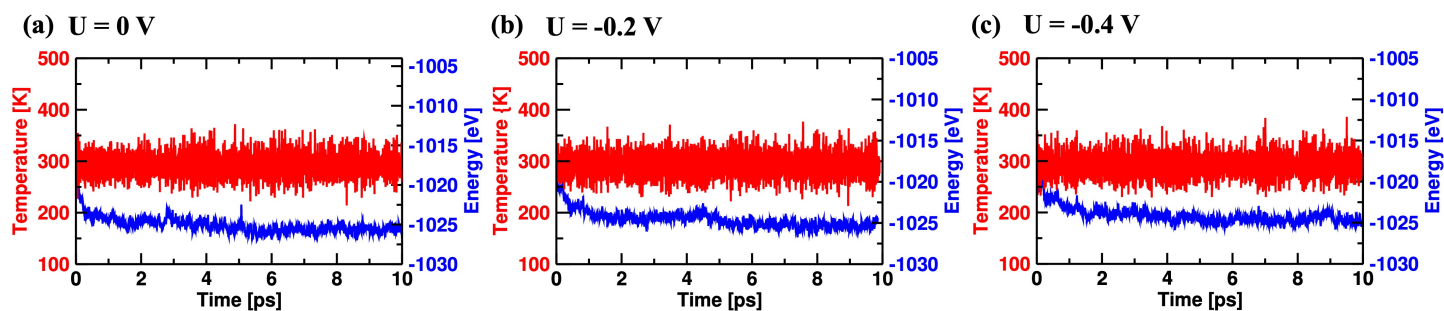

**Figure S5.** The equilibrated temperature and energy plot of the MoN<sub>4</sub>/H<sub>2</sub>O interface, during the CP-AIMD at (a) 0 V, (b) -0.2 V, and (c) -0.4 V vs RHE.

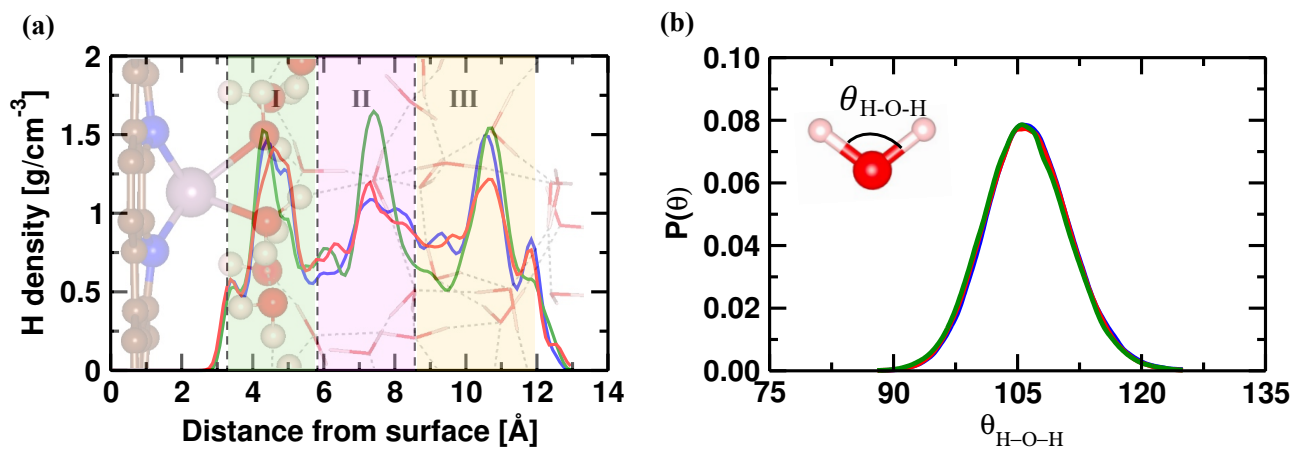

**Figure S6.** (a) The H density along the surface (z-axis), (b) Probability distribution of the H-O-H angle of water at 0, -0.2, and -0.4 V vs RHE.

**(I) At 0 V**

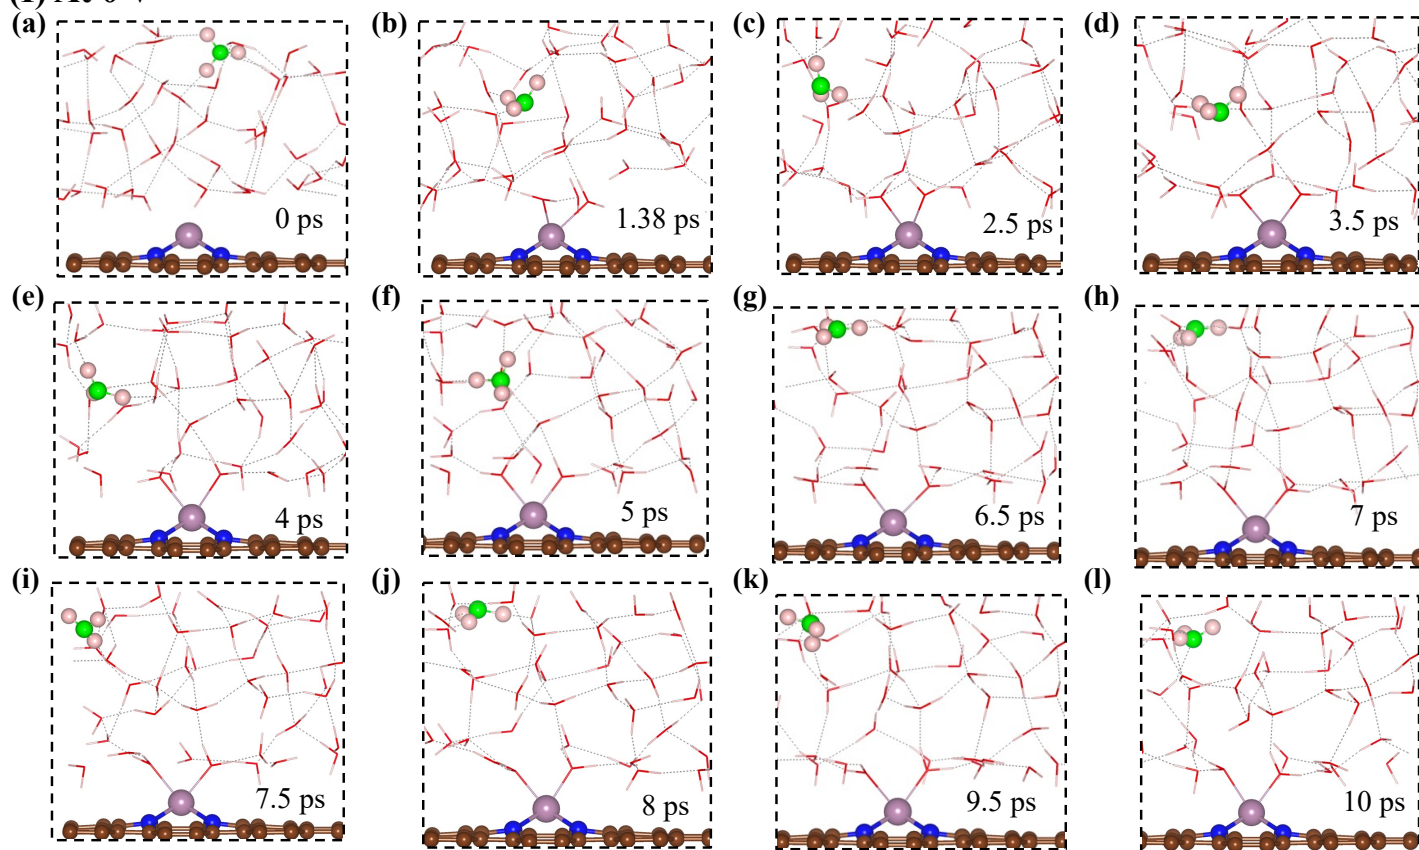

**Figure S7.** (a-l) The selective snapshot of the  $\text{H}_3\text{O}^+$  diffusion at 0 V vs RHE in acidic medium at the  $\text{MoN}_4/\text{H}_2\text{O}$  electrochemical interface.

**(II) At -0.2 V**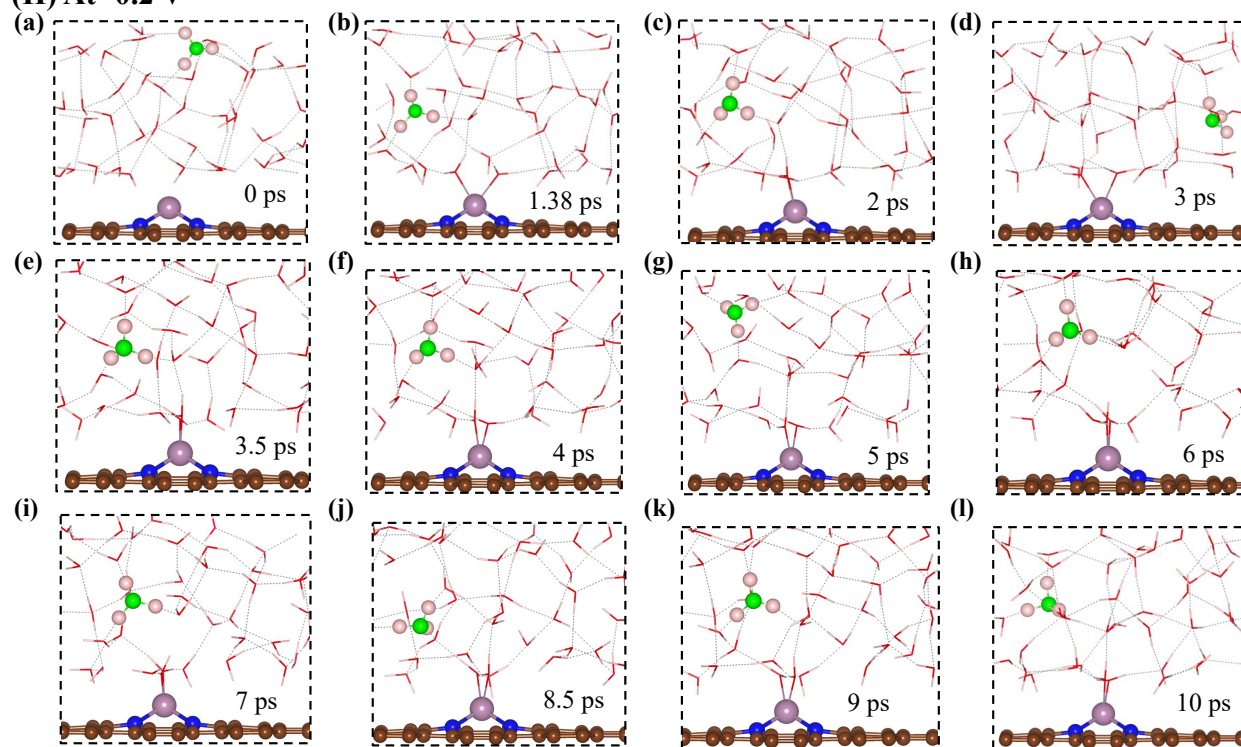

**Figure S8.** (a-l) The selective snapshot of the  $\text{H}_3\text{O}^+$  diffusion at -0.2 V vs RHE in acidic medium at the  $\text{MoN}_4/\text{H}_2\text{O}$  electrochemical interface.

**(III) At -0.4 V**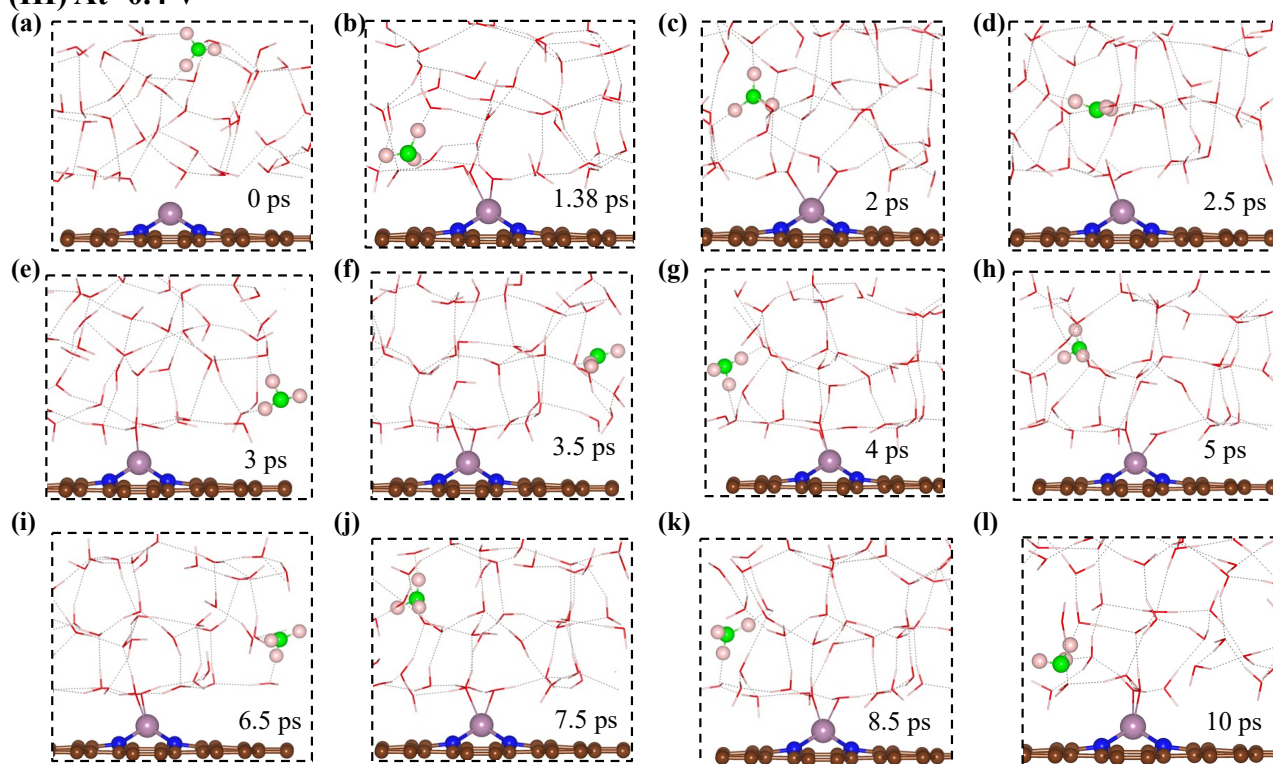

**Figure S9.** (a-l) The selective snapshot of the  $\text{H}_3\text{O}^+$  diffusion at -0.4 V vs RHE in acidic medium at the  $\text{MoN}_4/\text{H}_2\text{O}$  electrochemical interface.

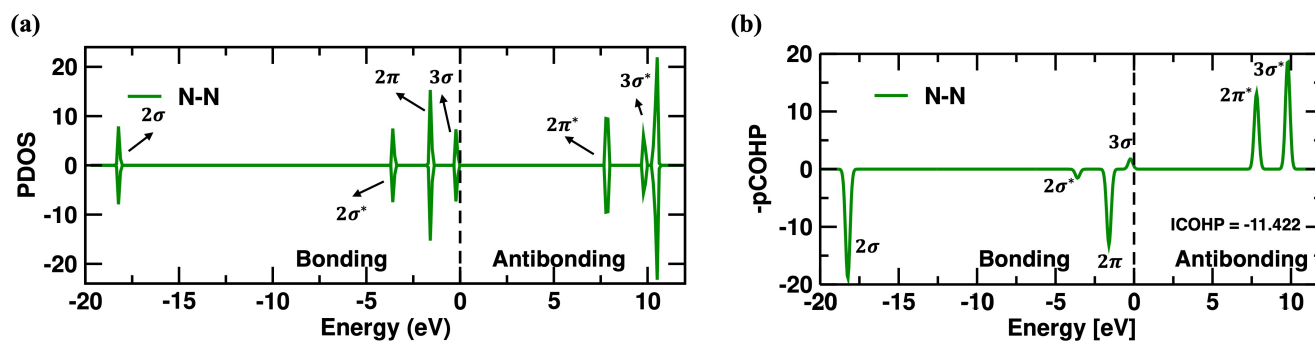

**Figure S10.** (a) The projected density of states (PDOS) and (b) ICOHP plot of the free  $\text{N}_2$  molecule.

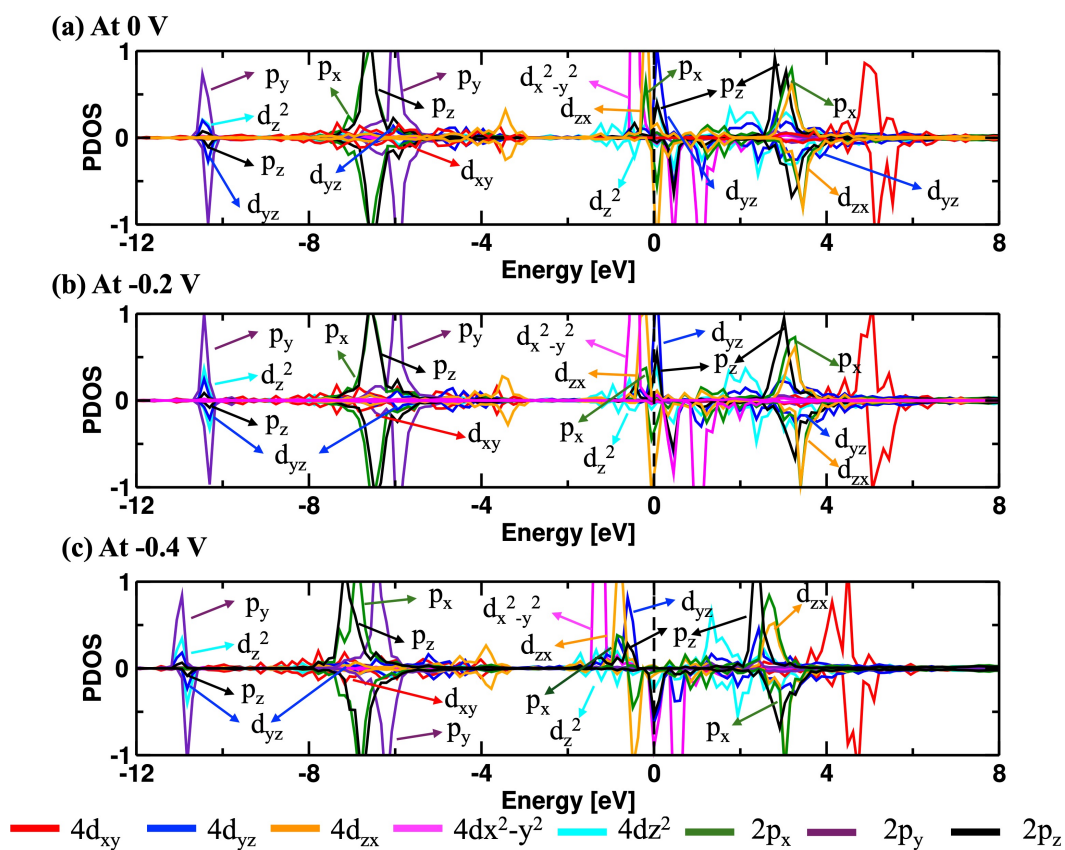

**Figure S11.** The Orbital-wise PDOS analysis of the  $^*\text{N}_2$  with Metal (Mo) in end-on configuration at (a) 0 V, (b) -0.2 V, and (c) -0.4 V vs RHE.

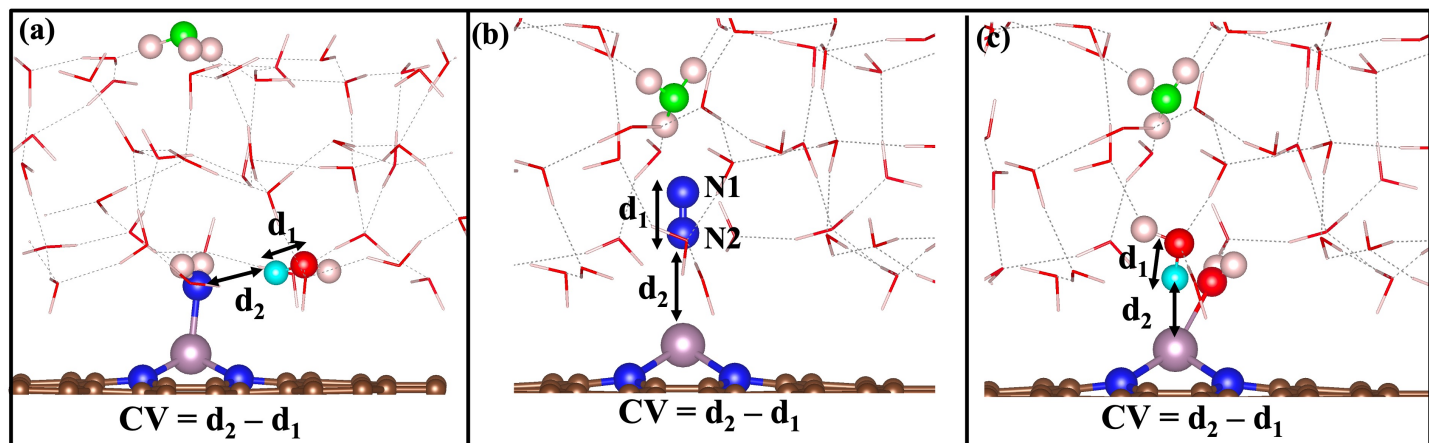

**Figure S12.** (a) The snapshots of the collective variable (CV) for the slow growth for (a) \*NH<sub>2</sub> protonation (b) \*N<sub>2</sub> adsorption, and (c) \*H adsorption at 0, -0.2, and -0.4 V vs RHE in acidic medium with pH=1 on MoN<sub>4</sub>/H<sub>2</sub>O interface. The H<sub>3</sub>O<sup>+</sup> represents the acidic medium shown by green colour, and the transferred proton is represented by cyan colour.

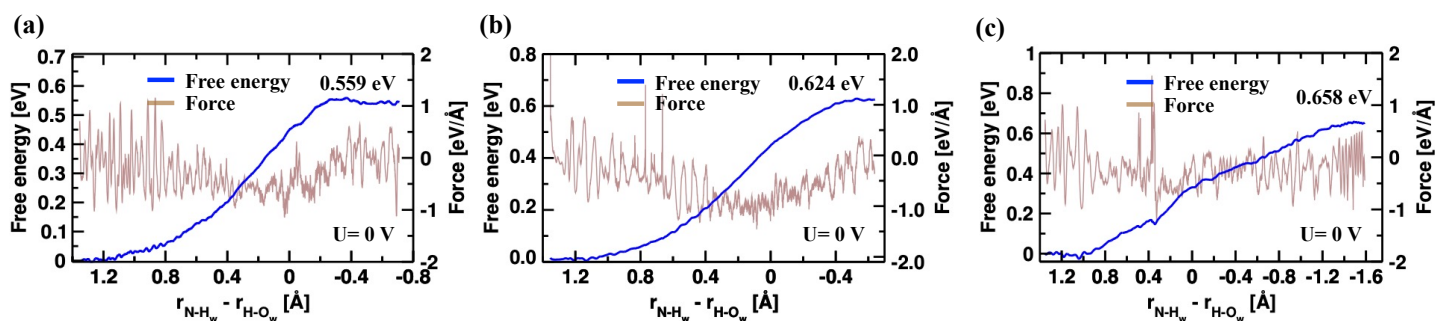

**Figure S13.** The reaction barrier for (a) \*NH<sub>2</sub> protonation at 0 V with (a) pulling speed of 0.0004 Å/time step (given in main manuscript), (b) with pulling speed of 0.0006 Å/time step, and (c) with pulling speed of 0.0008 Å/time step with pH=1 on the MoN<sub>4</sub>/H<sub>2</sub>O interface. The resulting barrier shows only minor variations within  $\pm 0.05$  eV.

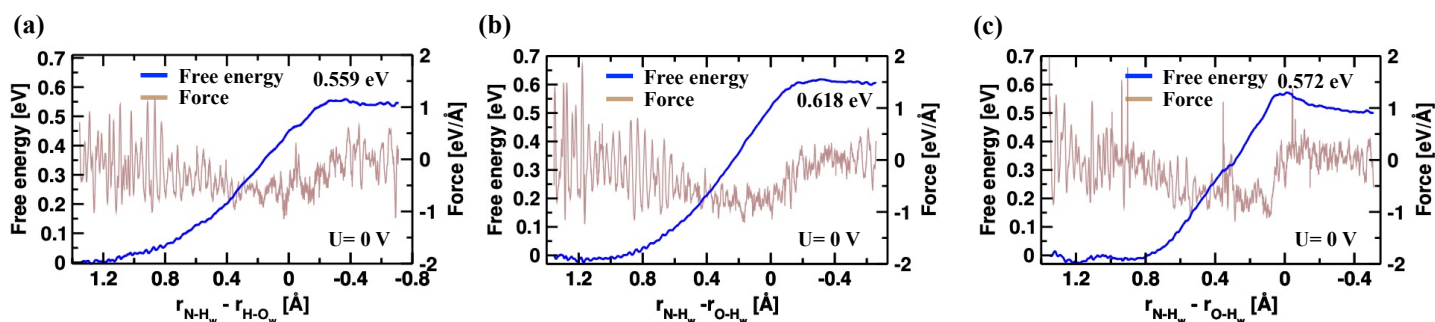

**Figure S14.** The three independent simulations of the \*NH<sub>2</sub> to \*NH<sub>3</sub> formation at 0 V, (a) first simulation (provided in main manuscript), (b) second simulation, (c) third simulation at pulling speed of 0.0004 Å/time step. The resulting barrier shows only minor variations within  $\pm 0.03$  eV.

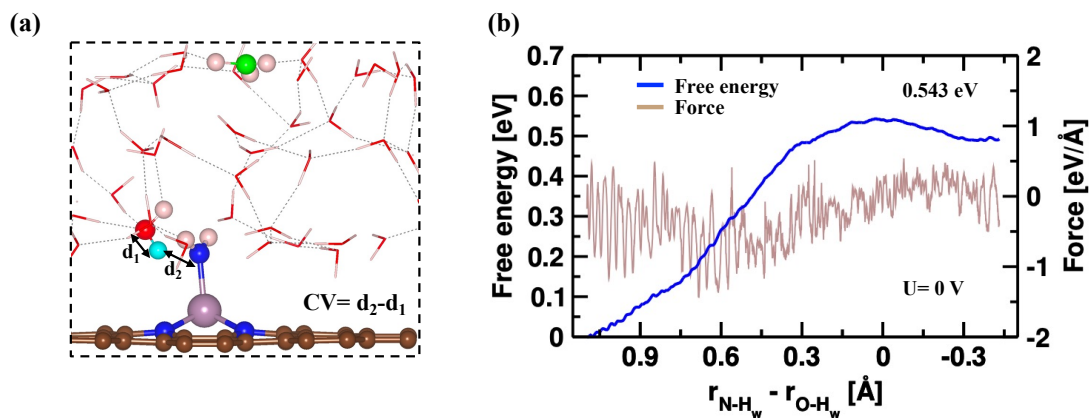

**Figure S15.** (a) The different initial configurations for the  $^*\text{NH}_2$  to  $^*\text{NH}_3$  formation at 0 V, (b) Free energy profiles and the corresponding forces during enhanced sampling along the reaction coordinate of pulling speed of  $0.0004 \text{ \AA}/\text{time step}$ .

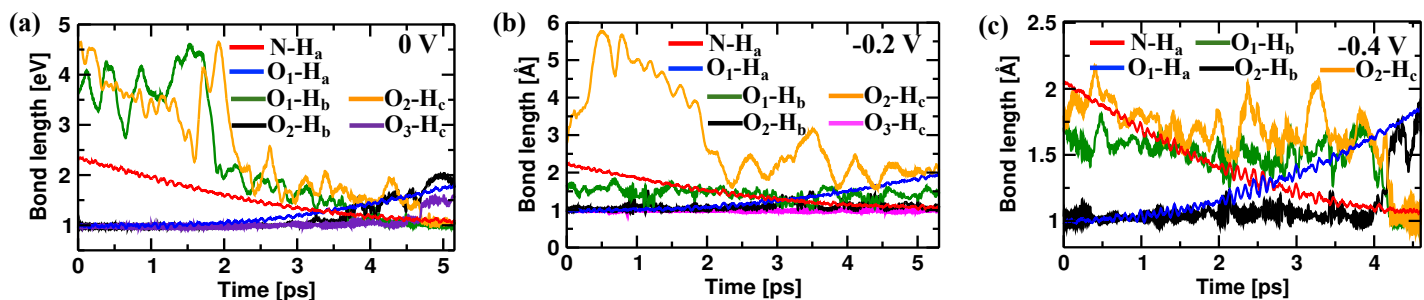

**Figure S16.** The change in the N-H and O-H bond length with time at applied potential of (a) 0 V, (b) -0.2 V, and (c) -0.4 V vs RHE in acidic medium at  $\text{MoN}_4/\text{H}_2\text{O}$  interface.

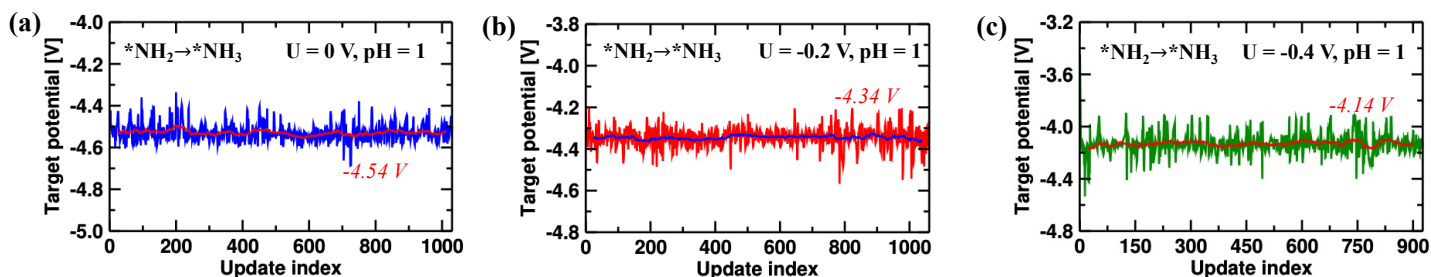

**Figure S17.** The evolution of the target potential during SG-AIMD simulation of the  $^*\text{NH}_2$  to  $^*\text{NH}_3$  formation at (a) 0, (b) -0.2, and (c) -0.4 V vs RHE.

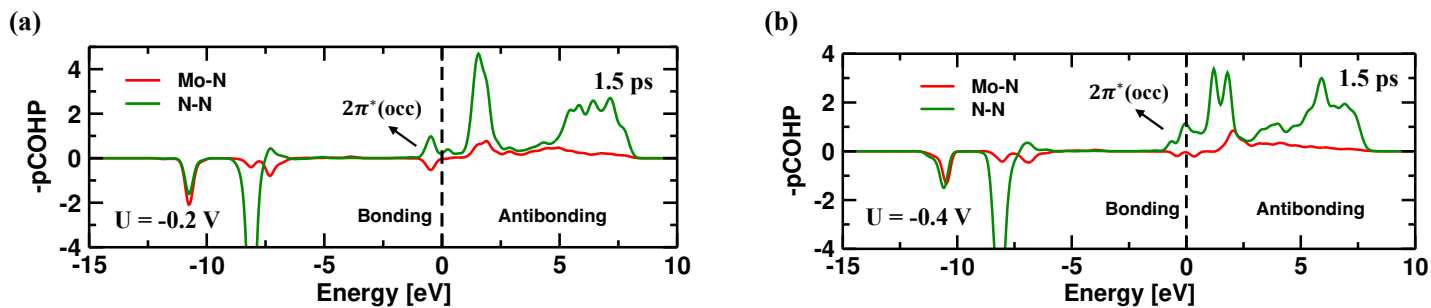

**Figure S18.** (a) The pCOHP plot of the  $\text{N}_2$  adsorption at 1.5 ps with applied potential of  $-0.2$  V vs RHE. (b) The pCOHP plot of the  $\text{N}_2$  adsorption at 1.5 ps with applied potential of  $-0.4$  V vs RHE.

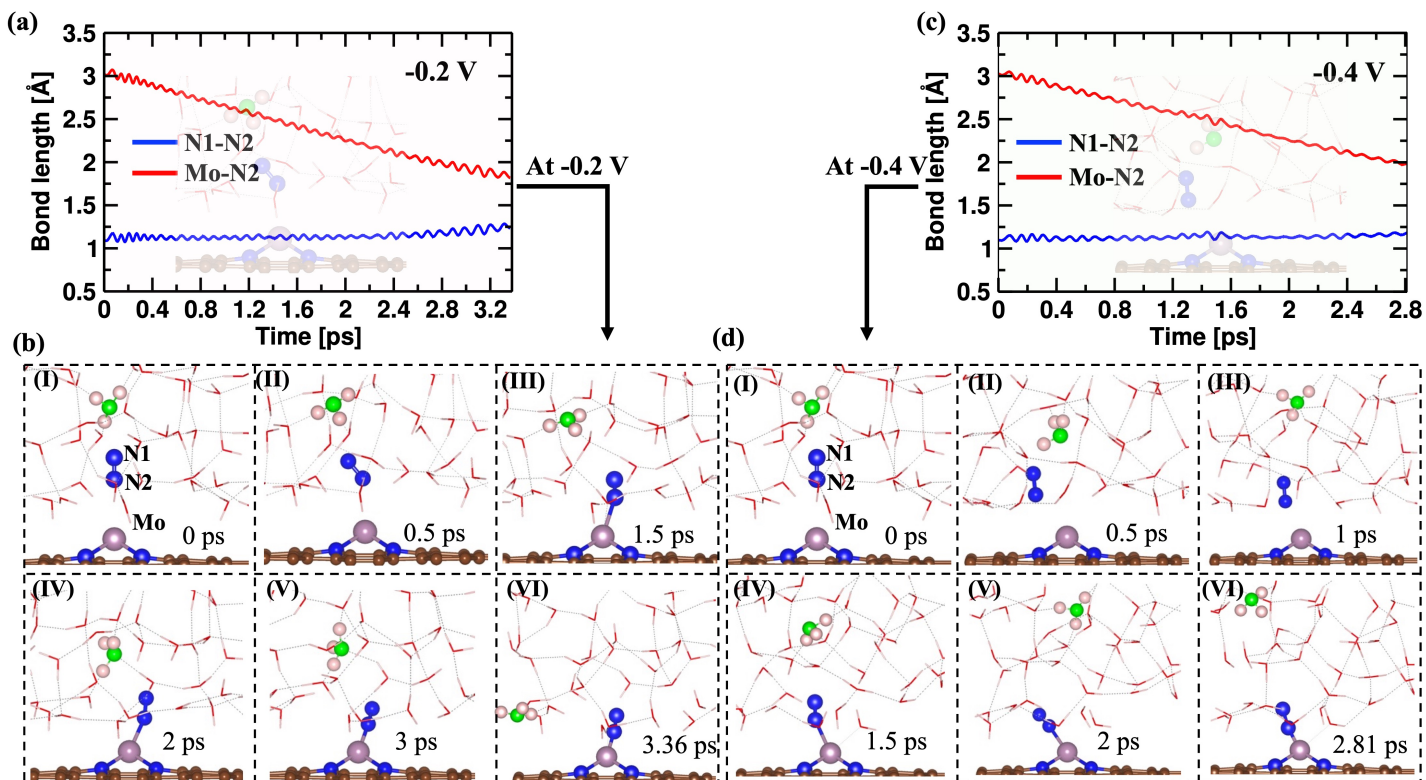

**Figure S19.** The change in the Mo-N2 and N1-N2 bond length, during the slow growth simulation, with a selective snapshot of  $\text{N}_2$  adsorption at (a)  $-0.2$  and (b)  $-0.4$  V vs RHE.

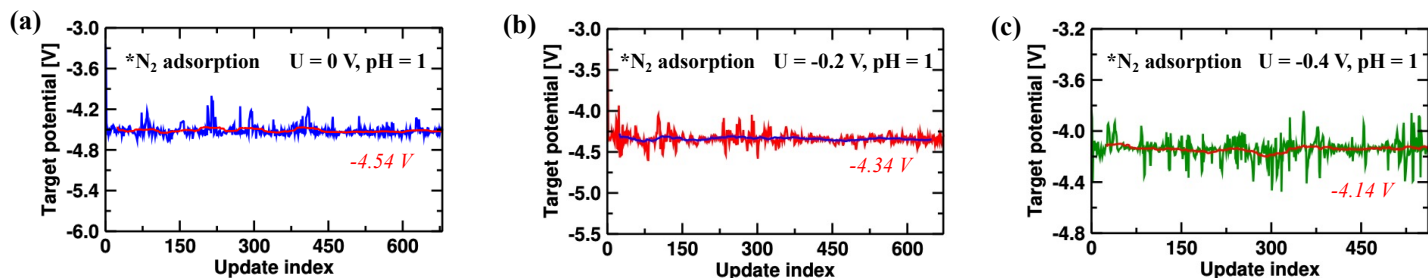

**Figure S20.** The evolution of the target potential during SG-AIMD simulation of the  $^*N_2$  adsorption at (a) 0, (b) -0.2, and (c) -0.4 V vs RHE.

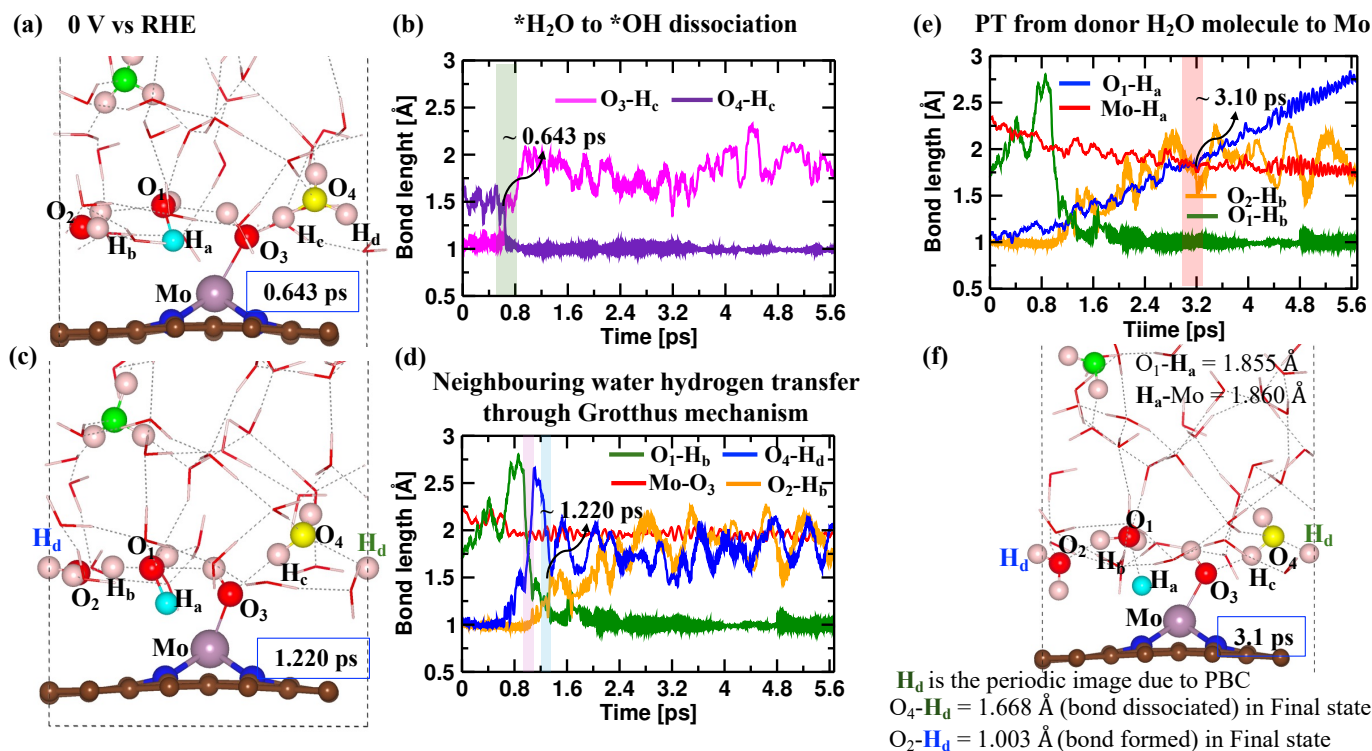

**Figure S21.** (a) The labeled snapshot at 0 V vs RHE, extracted from SG-AIMD simulation for the  $^*H$  adsorption, (b) The change in the intermolecular O-H bond length specifically at  $\sim 0.650$  ps, (c) The labeled snapshot at  $\sim 1.220$  ps. (d) The change in the bond length of Mo and adsorbed  $^*OH$  species and other O-H through H-bond network to visualize the time period, PT from  $H_3O^+$ , (e) The change in the O-H and Mo-H bond length during the PT at  $\sim 3.10$  ps (f) The labelled snapshot of PT from water molecule (proton donor) to Mo at  $\sim 3.10$  ps at 0 V vs RHE in acidic medium.

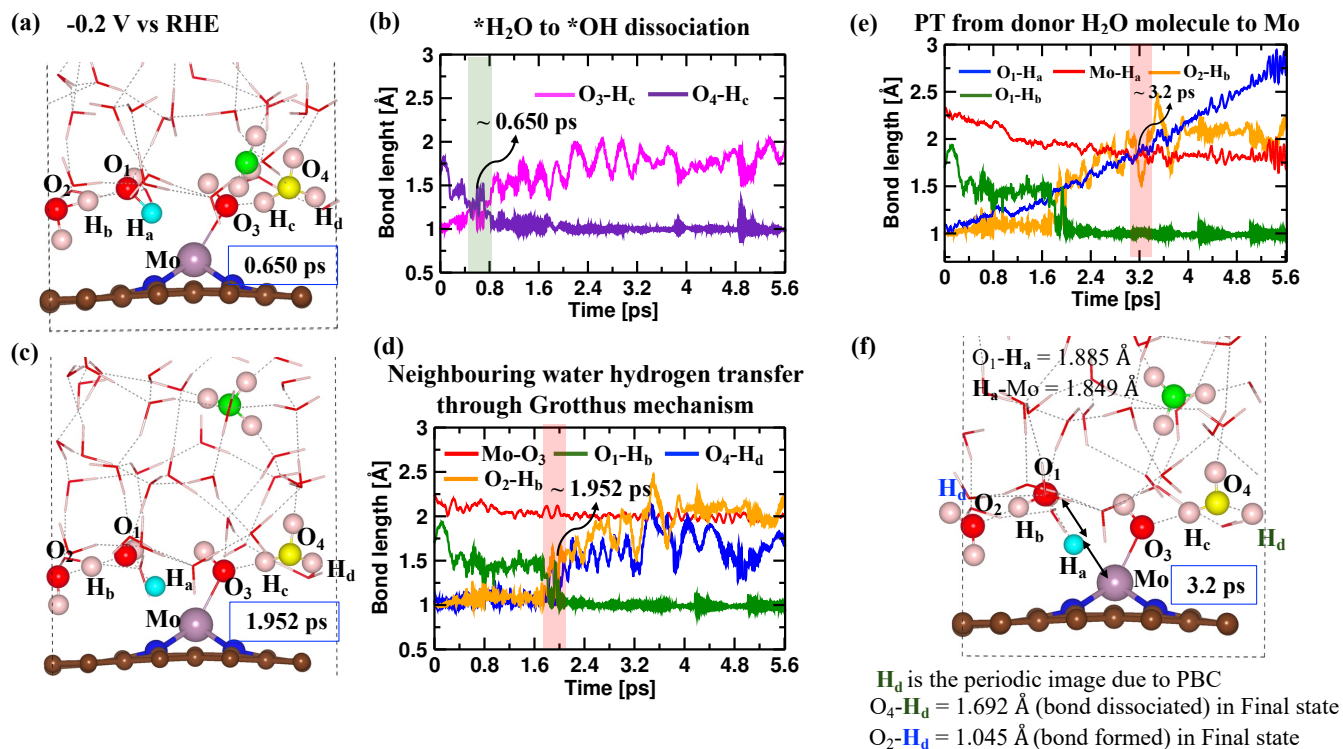

**Figure S22.** (a) The labeled snapshot at -0.2 V vs RHE, extracted from the SG-AIMD simulation for the \*H adsorption (b), The change in the intermolecular O-H bond length specifically at ~0.650 ps, (c) The labeled snapshot at ~1.952 ps. (d) The change in the bond length of Mo and adsorbed \*OH species and other O-H through H-bond network to visualize the time period, PT from H<sub>3</sub>O<sup>+</sup>, (e) The change in the O-H and Mo-H bond length during the PT at ~3.20 ps (f) The labeled snapshot of PT from water molecule (proton donor) to Mo at ~3.20 ps at -0.2 V vs RHE in acidic medium.

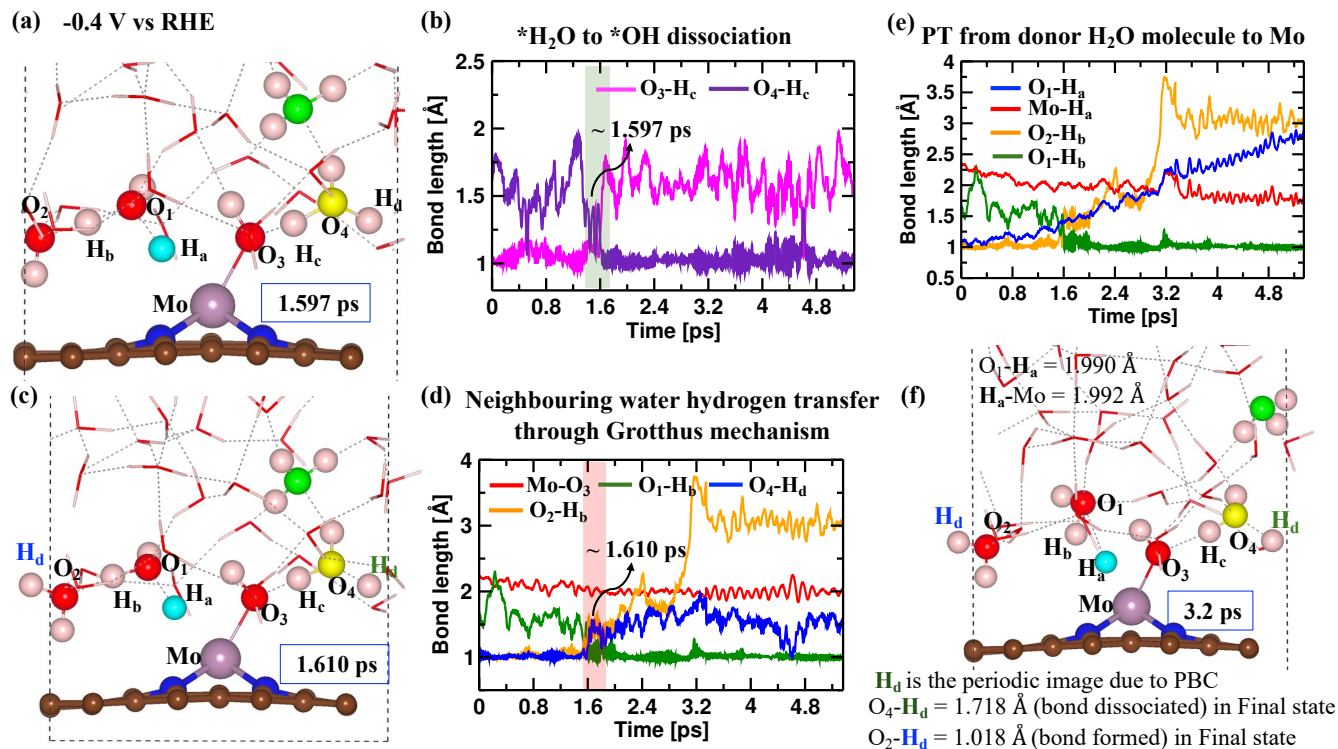

**Figure S23.** (a) The labeled snapshot at  $-0.4$  V vs RHE extract from SG-AIMD simulation for the  $^*H$  adsorption, (b) The change in the intermolecular O-H bond length specifically at  $\sim 1.597$  ps, (c) The labeled snapshot at  $\sim 1.610$  ps. (d) The change in the bond length of Mo and adsorbed  $^*OH$  species and other O-H through H-bond network to visualize the time period, PT from  $H_3O^+$ , (e) The change in the O-H and Mo-H bond length during the PT at  $\sim 3.20$  ps (f) The labeled snapshot of PT from water molecule (proton donor) to Mo at  $\sim 3.20$  ps at  $-0.4$  V vs RHE in acidic medium.

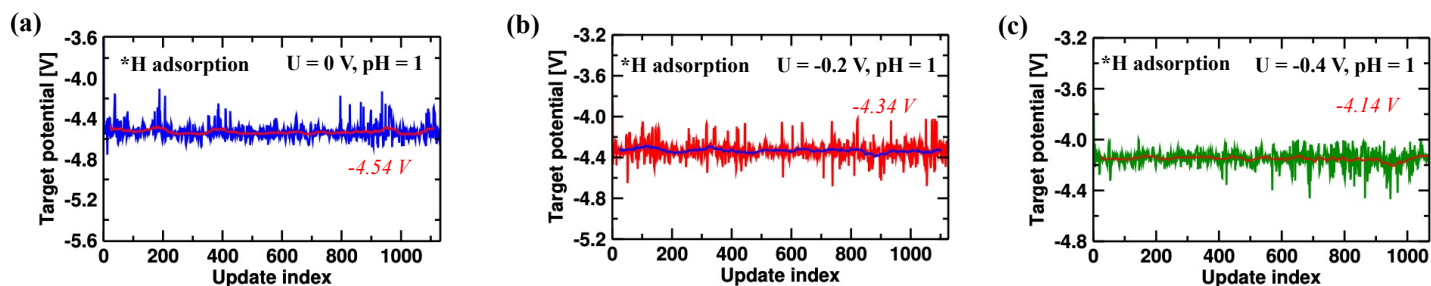

**Figure S24.** The evolution of the target potential during SG-AIMD simulation of the  $^*H$  adsorption at (a) 0, (b)  $-0.2$ , and (c)  $-0.4$  V vs RHE.

### 3. Supplementary Tables

**Table 1.** The MN<sub>4</sub> and MN<sub>3</sub> systems with a range of applied potential and reaction medium were studied through experimental and computational techniques.

| Catalysts | References | Potential range (RHE) | medium | Studies |
|-----------|------------|-----------------------|--------|---------|
|           |            |                       |        |         |

|                                                                   |                                                                                                                |                                        |                     |       |
|-------------------------------------------------------------------|----------------------------------------------------------------------------------------------------------------|----------------------------------------|---------------------|-------|
| FeN <sub>4</sub>                                                  | <i>Nat. Commun.</i> <b>2019</b> , 10, 1, 341                                                                   | +0.1 V to -0.4 V                       | acidic              | Exp.  |
| FeN <sub>4</sub>                                                  | <i>ACS Catal.</i> <b>2022</b> , 12, 18, 11530–11540                                                            | 0 to -0.8 V                            | acidic              | Comp. |
| RuN <sub>3</sub>                                                  | <i>Adv. Mater.</i> <b>2018</b> , 30, 40, 1803498                                                               | -0.2 to -0.6 V                         | acidic              | Exp.  |
| RuN <sub>4</sub>                                                  | <i>ACS Catal.</i> <b>2022</b> , 12, 4, 2505–2512                                                               | 0, -0.2 V and -0.5 V                   | acidic              | Comp. |
| MoN <sub>3</sub> and-MoN <sub>3</sub> + vacancy (V <sub>c</sub> ) | <i>Small</i> <b>2022</b> , 18 (15), e2106327<br><i>Angew. Chem., Int. Ed.</i> <b>2019</b> , 58 (8), 2321– 2325 | 0 to -0.2 V<br>-0.15 to -0.45 V        | acidic              | Exp.  |
| NiN <sub>3</sub>                                                  | <i>Small Methods</i> <b>2020</b> , 4 (6), 1900821                                                              | -0.3 V (alkaline ) and -0.1 V (acidic) | acidic and alkaline | Exp.  |
| NiN <sub>3</sub>                                                  | <i>ACS Catal.</i> <b>2025</b> , 15, 17, 15287–15301                                                            | -0.3 V (alkaline ) and -0.1 V (acidic) | acidic and alkaline | Comp. |
| MoN <sub>4</sub>                                                  | <b>This Work</b>                                                                                               | 0, -0.2 V and -0.4 V                   | acidic              | Comp. |

**Table 2.** The charge fluctuation at different time steps during the SG-AIMD simulation on \*NH<sub>2</sub> adsorption on MoN<sub>4</sub>/H<sub>2</sub>O interface at 0 V vs RHE in acidic medium

| Time (ps) | Charge on Mo atom  e | Charge of the H <sub>transfer</sub>  e | Charge of the *NH <sub>2</sub>  e |
|-----------|----------------------|----------------------------------------|-----------------------------------|
| 0         | +1.531               | +0.425                                 | -1.238                            |
| 0.5       | +1.534               | +0.506                                 | -1.325                            |
| 1         | +1.527               | +0.532                                 | -1.290                            |
| 1.5       | +1.528               | +0.475                                 | -1.239                            |
| 2         | +1.520               | +0.437                                 | -1.257                            |
| 2.5       | +1.513               | +0.469                                 | -1.297                            |
| 3         | +1.509               | +0.462                                 | -1.285                            |
| 3.5       | +1.523               | +0.421                                 | -1.254                            |
| 4         | +1.526               | +0.418                                 | -1.24                             |

|     |        |        |        |
|-----|--------|--------|--------|
| 4.5 | +1.596 | +0.410 | -1.211 |
| 5   | +1.595 | +0.399 | -1.216 |
| 5.1 | +1.522 | +0.391 | -1.209 |

**Table 3.** The charge fluctuation at different time steps during the SG-AIMD simulation on \*NH<sub>2</sub> adsorption on MoN<sub>4</sub>/H<sub>2</sub>O interface at -0.2 V vs RHE in acidic medium

| Time (ps) | Charge on Mo atom  e | Charge of the H <sub>transfer</sub>  e | Charge of the *NH <sub>2</sub>  e |
|-----------|----------------------|----------------------------------------|-----------------------------------|
| 0         | +1.578               | +0.643                                 | -1.314                            |
| 0.5       | +1.562               | +0.670                                 | -1.267                            |
| 1         | +1.540               | +0.659                                 | -1.281                            |
| 1.5       | +1.635               | +0.626                                 | -1.321                            |
| 2         | +1.692               | +0.597                                 | -1.323                            |

|     |        |        |        |
|-----|--------|--------|--------|
| 2.5 | +1.621 | +0.585 | -1.297 |
| 3   | +1.644 | +0.604 | -1.275 |
| 3.5 | +1.601 | +0.553 | -1.324 |
| 4   | +1.544 | +0.545 | -1.310 |
| 4.5 | +1.564 | +0.541 | -1.307 |
| 5   | +1.574 | +0.525 | -1.339 |
| 5.3 | +1.599 | +0.498 | -1.380 |

**Table 4.** The charge fluctuation at different time steps during the SG-AIMD simulation on \*NH<sub>2</sub> adsorption on MoN<sub>4</sub>/H<sub>2</sub>O interface at -0.4 V vs RHE in acidic medium

| Time (ps) | Charge on Mo atom  e | Charge of the H <sub>transfer</sub>  e | Charge of the *NH <sub>2</sub>  e |
|-----------|----------------------|----------------------------------------|-----------------------------------|
| 0         | +1.602               | +0.706                                 | -1.439                            |
| 0.5       | +1.600               | +0.663                                 | -1.422                            |
| 1         | +1.592               | +0.644                                 | -1.386                            |
| 1.5       | +1.609               | +0.630                                 | -1.387                            |
| 2         | +1.590               | +0.604                                 | -1.366                            |
| 2.5       | +1.582               | +0.561                                 | -1.407                            |
| 3         | +1.589               | +0.509                                 | -1.433                            |
| 3.5       | +1.593               | +0.551                                 | -1.467                            |
| 4         | +1.576               | +0.581                                 | -1.446                            |

|     |        |        |        |
|-----|--------|--------|--------|
| 4.6 | +1.566 | +0.531 | -1.411 |
|-----|--------|--------|--------|

**Table 5.** The charge fluctuation at different time steps during the SG-AIMD simulation on \*N<sub>2</sub> adsorption on MoN<sub>4</sub>/H<sub>2</sub>O interface at 0 V vs RHE in acidic medium.

| Time (ps) | Charge on Mo atom  e | Charge of the N(2)  e | Charge of the N(1)  e |
|-----------|----------------------|-----------------------|-----------------------|
| 0         | +1.306               | -0.893                | +0.783                |
| 0.5       | +1.473               | -0.594                | +0.361                |
| 1         | +1.460               | 0.194                 | -0.645                |
| 1.5       | +1.511               | 0.135                 | -0.496                |
| 2         | +1.534               | 0.075                 | -0.498                |
| 2.5       | +1.579               | 0.016                 | -0.505                |
| 3         | +1.562               | -0.430                | -0.515                |
| 3.4       | +1.593               | -0.531                | -0.533                |

**Table 6.** The charge fluctuation at different time steps during the SG-AIMD simulation on \*N<sub>2</sub> adsorption on MoN<sub>4</sub>/H<sub>2</sub>O interface at -0.2 V vs RHE in acidic medium.

| Time (ps) | Charge on Mo atom  e | Charge of the N(2)  e | Charge of the N(1)  e |
|-----------|----------------------|-----------------------|-----------------------|
| 0         | +1.39                | -0.887                | +0.779                |
| 0.5       | +1.425               | -0.899                | +0.695                |
| 1         | +1.371               | -0.751                | +0.410                |

|     |        |        |        |
|-----|--------|--------|--------|
| 1.5 | +1.525 | -0.709 | +0.151 |
| 2   | +1.471 | -0.618 | +0.151 |
| 2.5 | +1.442 | -0.630 | -0.096 |

**Table 7.** The charge fluctuation at different time steps during the SG-AIMD simulation on \*N<sub>2</sub> adsorption on MoN<sub>4</sub>/H<sub>2</sub>O interface at -0.4 V vs RHE in acidic medium.

| Time (ps) | Charge on Mo atom  e | Charge of the N(2)  e | Charge of the N(1)  e |
|-----------|----------------------|-----------------------|-----------------------|
| 0         | +1.478               | -0.890                | +0.781                |
| 0.5       | +1.572               | -0.852                | +0.583                |
| 1         | +1.565               | -0.849                | +0.446                |
| 1.5       | +1.592               | -0.768                | +0.315                |
| 2         | +1.584               | -0.707                | -0.047                |
| 2.5       | +1.573               | -0.721                | -0.113                |
| 2.81      | +1.608               | -0.658                | -0.186                |

**Table 8.** The charge fluctuation at different time steps during the SG-AIMD simulation on \*H adsorption on MoN<sub>4</sub>/H<sub>2</sub>O interface at 0 V vs RHE in acidic medium.

| Time (ps) | Charge on Mo atom  e | Charge of the *OH  e | Charge of the H <sub>transfer</sub>  e |
|-----------|----------------------|----------------------|----------------------------------------|
| 0         | +1.331               | -1.369               | +0.429                                 |
| 0.5       | +1.340               | -1.319               | +0.427                                 |
| 1         | +1.495               | -1.144               | +0.354                                 |

|      |        |        |        |
|------|--------|--------|--------|
| 3    | +1.479 | -0.691 | -0.142 |
| 3.36 | +1.512 | -0.678 | -0.294 |

|      |        |        |        |
|------|--------|--------|--------|
| 1.5  | +1.496 | -1.212 | +0.176 |
| 2    | +1.525 | -1.225 | +0.01  |
| 2.5  | +1.566 | -1.175 | -0.068 |
| 3    | +1.580 | -1.166 | -0.141 |
| 3.5  | +1.593 | -1.158 | -0.206 |
| 4    | +1.611 | -1.176 | -0.283 |
| 4.5  | +1.607 | -1.171 | -0.357 |
| 5    | +1.577 | -1.162 | -0.258 |
| 5.5  | +1.686 | -1.172 | -0.314 |
| 5.65 | +1.635 | -1.214 | -0.354 |

**Table 9.** The charge fluctuation at different time steps during the SG-AIMD simulation on \*H adsorption on MoN<sub>4</sub>/H<sub>2</sub>O interface at -0.2 V vs RHE in acidic medium.

| Time (ps) | Charge on Mo atom  e | Charge of the *OH  e | Charge of the H <sub>transfer</sub>  e |
|-----------|----------------------|----------------------|----------------------------------------|
| 0         | +1.411               | -1.399               | +0.461                                 |
| 0.5       | +1.437               | -1.338               | +0.375                                 |
| 1         | +1.362               | -1.272               | +0.347                                 |

|      |        |        |        |
|------|--------|--------|--------|
| 1.5  | +1.409 | -1.326 | +0.167 |
| 2    | +1.490 | -1.221 | +0.008 |
| 2.5  | +1.507 | -1.142 | -0.157 |
| 3    | +1.501 | -1.181 | -0.270 |
| 3.5  | +1.583 | -1.223 | -0.382 |
| 4    | +1.548 | -1.200 | -0.427 |
| 4.5  | +1.493 | -1.228 | -0.371 |
| 5    | +1.549 | -1.252 | -0.404 |
| 5.35 | +1.553 | -1.269 | -0.408 |
| 5.65 | +1.599 | -1.285 | -0.419 |

| Time (ps) | Charge on Mo atom  e | Charge of the *OH  e | Charge of the H <sub>transfer</sub>  e |
|-----------|----------------------|----------------------|----------------------------------------|
| 0         | +1.340               | -1.369               | +0.485                                 |
| 0.5       | +1.352               | -1.300               | +0.400                                 |
| 1         | +1.474               | -1.212               | +0.251                                 |
| 1.5       | +1.440               | -1.265               | +0.140                                 |
| 2         | +1.531               | -1.332               | -0.031                                 |
| 2.5       | +1.674               | -1.262               | -0.118                                 |
| 3         | +1.698               | -1.203               | -0.171                                 |
| 3.5       | +1.737               | -1.284               | -0.300                                 |
| 4         | +1.724               | -1.182               | -0.298                                 |
| 4.5       | +1.726               | -1.158               | -0.321                                 |
| 5         | +1.778               | -1.217               | -0.353                                 |
| 5.35      | +1.758               | -1.283               | -0.449                                 |

**Table 10.** The charge fluctuation at different time steps during the SG-AIMD simulation on \*H adsorption on MoN<sub>4</sub>/H<sub>2</sub>O interface at -0.4 V vs RHE in acidic medium.

#### 4. Video files of the studied reaction

Video S1. The AIMD trajectory of the Mo leaching from the N-doped graphene surface at 0.0 V vs RHE

Video S2. The AIMD trajectory of the \*NH<sub>2</sub> protonation at 0.0 V vs RHE in acidic medium

Video S3. The AIMD trajectory of the \*NH<sub>2</sub> protonation at -0.2 V vs RHE in acidic medium

Video S4. The AIMD trajectory of the \*NH<sub>2</sub> protonation at -0.4 V vs RHE in acidic medium

Video S5. The AIMD trajectory of the \*N<sub>2</sub> adsorption at 0.0 V vs RHE in acidic medium

Video S6. The AIMD trajectory of the \*N<sub>2</sub> adsorption at -0.4 V vs RHE in acidic medium

Video S7. The AIMD trajectory of the \*H adsorption at 0.0 V vs RHE in acidic medium

Video S8. The AIMD trajectory of the \*H adsorption at -0.2 V vs RHE in acidic medium

Video S9. The AIMD trajectory of the \*H adsorption at -0.4 V vs RHE in acidic medium

## 5. References

- (1) Mathew, K.; Sundararaman, R.; Letchworth-Weaver, K.; Arias, T. A.; Hennig, R. G. Implicit Solvation Model for Density-Functional Study of Nanocrystal Surfaces and Reaction Pathways. *J. Chem. Phys.* **2014**, *140* (8), 084106. <https://doi.org/10.1063/1.4865107>.
- (2) Gauthier, J. A.; Dickens, C. F.; Heenen, H. H.; Vijay, S.; Ringe, S.; Chan, K. Unified Approach to Implicit and Explicit Solvent Simulations of Electrochemical Reaction Energetics. *J. Chem. Theory Comput.* **2019**, *15* (12), 6895–6906. <https://doi.org/10.1021/acs.jctc.9b00717>.
- (3) Monkhorst, H. J.; Pack, J. D. Special Points for Brillouin-Zone Integrations. *Phys. Rev. B* **1976**, *13* (12), 5188–5192. <https://doi.org/10.1103/PhysRevB.13.5188>.
- (4) Nørskov, J. K.; Rossmeisl, J.; Logadottir, A.; Lindqvist, L.; Kitchin, J. R.; Bligaard, T.; Jónsson, H. Origin of the Overpotential for Oxygen Reduction at a Fuel-Cell Cathode. *J. Phys. Chem. B* **2004**, *108* (46), 17886–17892. <https://doi.org/10.1021/jp047349j>.
- (5) Li, P.; Jiang, Y.; Hu, Y.; Men, Y.; Liu, Y.; Cai, W.; Chen, S. Hydrogen Bond Network Connectivity in the Electric Double Layer Dominates the Kinetic pH Effect in Hydrogen Electrocatalysis on Pt. *Nat. Catal.* **2022**, *5* (10), 900–911. <https://doi.org/10.1038/s41929-022-00846-8>.
- (6) Teja, D. S.; Mallik, B. S. Breaking the Barrier: How Alkali Cations Promote Enhanced N<sub>2</sub> Adsorption and \*NNH Formation. *ACS Catal.* **2025**, *15* (17), 15287–15301. <https://doi.org/10.1021/acscatal.5c04857>.
- (7) Qian, S.-J.; Cao, H.; Chen, J.-W.; Chen, J.-C.; Wang, Y.-G.; Li, J. Critical Role of Explicit Inclusion of Solvent and Electrode Potential in the Electrochemical Description of Nitrogen Reduction. *ACS Catal.* **2022**, *12* (18), 11530–11540. <https://doi.org/10.1021/acscatal.2c03186>.
- (8) Wu, T.; Melander, M. M.; Honkala, K. Coadsorption of NRR and HER Intermediates Determines the Performance of Ru-N<sub>4</sub> toward Electrocatalytic N<sub>2</sub> Reduction. *ACS Catal.* **2022**, *12* (4), 2505–2512. <https://doi.org/10.1021/acscatal.1c05820>.

### The coordinates of Mo leaching on the MoN<sub>4</sub>/H<sub>2</sub>O interface during the SG-AIMG

#### At 0 V vs RHE

|                |            |            |            |
|----------------|------------|------------|------------|
| C              | 0.37502911 | 0.98665844 | 0.04713208 |
| 1.0            | 0.62662565 | 0.64812565 | 0.05190071 |
| 9.824384       | 0.0        | 0.0        | 0.62210425 |
| 0.0            | 12.762371  | 0.0        | 0.98665844 |
| 0.0            | 0.0        | 25.5       | 0.04713208 |
| C N Mo O H He  | 0.87542995 | 0.31902779 | 0.04095263 |
| 42 4 1 40 80 1 | 0.87426540 | 0.65275731 | 0.04205020 |
| Direct         | 0.87279864 | 0.98599241 | 0.04273894 |
| 0.12170330     | 0.12289117 | 0.20775850 | 0.04214176 |
| 0.12286877     | 0.12172784 | 0.54144242 | 0.04089157 |
| 0.12433451     | 0.12433665 | 0.87453193 | 0.04270788 |
| 0.37050883     | 0.37053326 | 0.21237355 | 0.05197314 |
|                | 0.37500865 | 0.87387391 | 0.04710267 |
|                | 0.62660010 | 0.21237355 | 0.05197314 |

0.62212552 0.87387391 0.04710267  
0.87424219 0.20775850 0.04214176  
0.87540552 0.54144242 0.04089157  
0.87279793 0.87453193 0.04270788  
0.99856693 0.15210113 0.04118694  
0.99856693 0.48543182 0.03793733  
0.99856693 0.81974572 0.04190933  
0.24862841 0.15363603 0.04551278  
0.24346056 0.48654682 0.04794792  
0.24972161 0.81868808 0.04476129  
0.49856673 0.15832176 0.05229408  
0.49856673 0.81565581 0.04898659  
0.74850606 0.15363603 0.04551278  
0.75367280 0.48654682 0.04794792  
0.74741276 0.81868808 0.04476129  
0.99856693 0.04077957 0.04196314  
0.99856693 0.37503776 0.03797400  
0.99856693 0.70842792 0.04110027  
0.24973169 0.04180156 0.04481710  
0.24344946 0.37398153 0.04797357  
0.24864969 0.70687727 0.04543039  
0.49856673 0.04486807 0.04904224  
0.49856673 0.70218692 0.05221804  
0.74740157 0.04180156 0.04481710  
0.75368390 0.37398153 0.04797357  
0.74848469 0.70687727 0.04543039  
0.36177535 0.31960911 0.05808553  
0.63535902 0.31960911 0.05808553  
0.63534060 0.54092848 0.05803294  
0.36179266 0.54092848 0.05803294  
0.37976549 0.34758044 0.16055985  
0.03286588 0.66059160 0.34207770  
0.06595531 0.87199589 0.28962034  
0.52108308 0.56355996 0.22010121  
0.52512287 0.95098975 0.23172498  
0.48659919 0.25328774 0.20426266  
0.77268041 0.69009855 0.36074841  
0.55024449 0.77247860 0.30373439  
0.83632236 -0.08334907 0.35384014  
0.57735051 0.51317466 0.43475041  
0.54796843 -0.04607323 0.35556335  
0.29577818 0.85285403 0.17005520  
0.55348712 0.25512348 0.3425297  
-0.08239951 0.43189787 0.19978786  
0.28959636 0.83694195 0.43841384  
0.18807330 0.66137643 0.42863640  
0.93244066 0.58353120 0.46690491  
0.24239474 0.93786500 0.35204720  
0.87503845 0.04456575 0.44698559  
0.79154810 0.05196264 0.20269161  
0.52509201 0.02704839 0.46719653  
0.77955981 0.26104395 0.18437271  
0.57798623 0.73678785 0.44687602  
0.45251387 0.12709593 0.28238714  
0.06608029 0.90860915 0.18915808  
0.28595860 0.47342172 0.42823013  
0.68489071 0.19143541 0.42745621  
0.85471871 0.80715319 0.17307911  
0.78360161 0.62653814 0.22008517  
0.22717793 0.38883136 0.18772585  
0.33979277 -0.00894197 0.60611053  
0.11804264 0.34490246 0.48601381

0.17913928 0.54271983 0.26354575  
0.73583535 -0.10733318 0.50230284  
0.74048086 0.36635685 0.47790600  
0.09134061 0.17998963 0.22499829  
0.13588377 0.22030874 0.32932738  
0.33506365 0.37520541 0.33594765  
0.11350173 0.15470629 0.44185686  
0.34397902 0.70229632 0.23073010  
0.26929065 0.02152009 0.50268132  
0.05792502 0.72674178 0.32270232  
0.10286097 0.65297993 0.36871791  
0.04795018 0.88550474 0.22837405  
-0.01504338 0.89000753 0.30858254  
0.47306051 0.50323148 0.20518902  
0.61635947 0.56869960 0.20770113  
0.54296602 0.88045217 0.24920880  
0.45713032 0.93457296 0.20522641  
0.46938718 0.15967823 0.24618019  
0.58919009 0.24139381 0.19635201  
0.72931976 0.64293858 0.38703419  
0.86984579 0.67250440 0.35535815  
0.62869042 0.72426602 0.30540957  
0.47615236 0.72838011 0.28940449  
0.81313270 0.84306587 0.36047627  
0.74149466 -0.05782310 0.35157667  
0.48032478 0.49467946 0.43439634  
0.58830336 0.58750655 0.44688736  
0.32831261 0.97476192 0.34801461  
0.52390916 -0.03767792 0.39369485  
0.30820061 0.78577377 0.19710614  
0.34163931 0.83018213 0.13827721  
0.61397344 0.22729118 0.37259839  
0.49525962 0.18957139 0.31905471  
-0.13332921 0.36456923 0.19406135  
0.15184402 0.48791324 0.23924818  
0.25504339 0.87256845 0.46840509  
0.24162156 0.76356069 0.43577707  
1.11295175 0.62902458 0.44959172  
0.25310345 0.60457220 0.42003365  
0.93698436 0.50541524 0.46230525  
0.88043584 0.59870790 0.49669851  
0.25223686 0.89235260 0.38880789  
0.14603164 0.89723672 0.31055126  
0.95973383 0.08868496 0.45076099  
0.88019517 0.00493556 0.41356205  
0.85846968 1.00552447 0.19037850  
0.70982059 0.01052556 0.20840734  
0.58469226 0.08606922 0.45228226  
0.58328581 -0.01035357 0.49303187  
-0.20595965 0.27107002 0.14518480  
-0.21063412 0.18303137 0.19243573  
0.49592249 0.77282113 0.43444674  
0.64410698 0.78941603 0.45941606  
0.48575353 0.05592815 0.28235915  
0.53600906 -0.12186715 0.34835607  
0.16860156 0.87864206 0.17636824  
-0.01759389 0.87598767 0.17131116  
0.30104818 0.43291815 0.39428199  
0.20949998 0.43981425 0.44517525  
0.76769640 0.14337334 0.43058510  
0.70718397 0.26460954 0.44510144  
0.83167680 0.74941892 0.19800365

0.79283312 0.80185499 0.14262550  
0.83339913 0.56083920 0.20873452  
0.80033398 0.63192018 0.25920868  
0.00615366 0.42072371 0.18345755  
0.54751744 0.49585435 0.06578600  
0.38903729 0.05512936 0.61597588  
0.29955769 -0.04037780 0.63943167  
0.17563576 0.33484547 0.51829947  
0.11916083 0.27031279 0.46888474  
0.31567196 0.42033409 0.30362268  
0.09735334 0.56706518 0.28183816  
0.76030130 -0.10023045 0.53915872  
0.81237019 -0.06868902 0.48552610  
0.73806580 0.33577267 0.51434104  
0.66453374 0.41674685 0.47505783  
0.13531562 0.22114110 0.19851576  
0.10970587 0.10578674 0.21313784  
0.11976929 0.20303520 0.29092274  
0.05939248 0.26545549 0.33746417  
0.27648866 0.31152698 0.33220218  
0.48031812 0.30670488 0.34828533  
0.12590784 0.14045316 0.40345390  
0.17617769 0.10629100 0.46281813  
0.27573091 0.64918861 0.24241031  
0.42375655 0.64672126 0.21839489  
0.36587168 0.03052668 0.48792088  
0.28043886 0.00571352 0.53955923  
0.49545193 0.43193776 0.55000000

#### At -0.2 V vs RHE

C

1.0

9.824384 0.0 0.0

0.0 12.762371 0.0

0.0 0.0 25.5

C N Mo O H He

42 4 1 40 80 1

Direct

0.12170330 0.31902779 0.04095263  
0.12286877 0.65275731 0.04205020  
0.12433451 0.98599241 0.04273894  
0.37050883 0.64812565 0.05190071  
0.37502911 0.98665844 0.04713208  
0.62662565 0.64812565 0.05190071  
0.62210425 0.98665844 0.04713208  
0.87542995 0.31902779 0.04095263  
0.87426540 0.65275731 0.04205020  
0.87279864 0.98599241 0.04273894  
0.12289117 0.20775850 0.04214176  
0.12172784 0.54144242 0.04089157  
0.12433665 0.87453193 0.04270788  
0.37053326 0.21237355 0.05197314  
0.37500865 0.87387391 0.04710267  
0.62660010 0.21237355 0.05197314  
0.62212552 0.87387391 0.04710267  
0.87424219 0.20775850 0.04214176  
0.87540552 0.54144242 0.04089157  
0.87279793 0.87453193 0.04270788

0.99856693 0.15210113 0.04118694  
0.99856693 0.48543182 0.03793733  
0.99856693 0.81974572 0.04190933  
0.24862841 0.15363603 0.04551278  
0.24346056 0.48654682 0.04794792  
0.24972161 0.81868808 0.04476129  
0.49856673 0.15832176 0.05229408  
0.49856673 0.81565581 0.04898659  
0.74850606 0.15363603 0.04551278  
0.75367280 0.48654682 0.04794792  
0.74741276 0.81868808 0.04476129  
0.99856693 0.04077957 0.04196314  
0.99856693 0.37503776 0.03797400  
0.99856693 0.70842792 0.04110027  
0.24973169 0.04180156 0.04481710  
0.24344946 0.37398153 0.04797357  
0.24864969 0.70687727 0.04543039  
0.49856673 0.04486807 0.04904224  
0.49856673 0.70218692 0.05221804  
0.74740157 0.04180156 0.04481710  
0.75368390 0.37398153 0.04797357  
0.74848469 0.70687727 0.04543039  
0.36177535 0.31960911 0.05808553  
0.63535902 0.31960911 0.05808553  
0.63534060 0.54092848 0.05803294  
0.36179266 0.54092848 0.05803294  
0.49562030 0.41100013 0.14482795  
0.10678511 0.89480308 0.31524642  
0.32278809 0.05837310 0.30453447  
0.87507698 0.66488342 0.25420490  
0.78537650 0.17766368 0.17051795  
0.65869814 0.41148211 0.18904061  
0.90158289 0.04829026 0.33771730  
0.74199433 1.01526357 0.24484018  
0.09165453 0.20456856 0.30200009  
0.57079540 0.82838995 0.36122280  
0.61032093 0.23983073 0.37647340  
0.50898645 0.78229725 0.16975860  
0.53539704 0.48832228 0.32136187  
0.26286249 0.66183424 0.17299484  
0.37836003 0.04752291 0.48071928  
0.11312326 0.75740114 0.38078330  
0.99562886 0.86074444 0.46271987  
0.42110772 0.12318524 0.39794636  
1.07547716 0.36264215 0.36729640  
1.03120975 0.22563924 0.20668655  
0.73826794 0.29245799 0.45603847  
0.88577583 0.52910771 0.17119559  
0.75242480 -0.05222192 0.40728083  
0.62752265 0.23671321 0.26341358  
0.42458314 0.02174233 0.20935455  
0.36339920 0.66027939 0.37685532  
0.85844479 0.53087448 0.34970151  
0.16797142 0.07518596 0.17592778  
1.01836982 0.90627119 0.17932197  
0.31986126 0.47132924 0.18658504  
0.11158223 0.06221525 0.47955272  
0.44191836 0.51116842 0.46169535  
0.11384153 0.75692353 0.23634044  
0.97805722 0.20900835 0.42439088  
0.71154969 0.49299950 0.47899142  
0.45081832 0.27521348 0.18875311

0.09092947 0.40659854 0.15744952  
0.26877084 0.58516382 0.28735498  
0.34309618 0.34927465 0.40023496  
0.67883134 0.80765073 0.25117492  
0.52311842 0.18025251 0.54588118  
0.18656876 0.94594725 0.31681711  
0.11904268 0.84842791 0.34853236  
0.37026333 0.05004238 0.27116762  
0.25083485 0.11375865 0.30299934  
0.88537732 0.61731148 0.28500166  
0.88993228 0.61453497 0.22226753  
0.78315959 0.10149212 0.17894903  
0.78447994 0.17850633 0.12999354  
0.71320976 0.25618324 0.24470271  
0.73133922 0.46559745 0.18174023  
0.83147935 0.01582474 0.35974149  
0.96836669 0.98861799 0.32726795  
0.78052023 1.03255202 0.28088867  
0.71641955 0.93993535 0.24287723  
1.01914909 0.15876192 0.31215266  
1.05974918 0.22694858 0.26638396  
0.50681273 0.76998054 0.36677650  
0.58778166 0.83172674 0.32521661  
0.51866117 0.16807032 0.39227117  
0.67709685 0.27115935 0.40629361  
0.52618234 0.79237427 0.13240717  
0.43351532 0.72825129 0.17093281  
0.62330966 0.50761679 0.33460744  
0.54910836 0.47359368 0.28303973  
0.24107185 0.66202943 0.13469549  
0.19505206 0.69972909 0.19539801  
0.42590906 0.08810058 0.50814726  
0.28015720 0.04387963 0.48955764  
0.09069720 0.78478948 0.41613866  
0.20561327 0.72750033 0.38271328  
0.97146982 0.87223287 0.50035130  
0.91228137 0.88281247 0.44359968  
0.39986826 0.07929218 0.43583073  
0.38264771 0.09173331 0.36475720  
0.16704748 0.37482897 0.38238947  
1.08917346 0.31740571 0.33556653  
0.09515737 0.16731556 0.19456204  
0.93824142 0.19714807 0.19192815  
0.74010091 0.36885182 0.46405042  
0.83025816 0.26579684 0.45438987  
0.85908134 0.56502985 0.13817181  
0.96054229 0.48001285 0.16009822  
0.67239179 0.90582075 0.39636240  
0.71766505 -0.01391146 0.43646517  
0.62965429 0.15632385 0.25909846  
0.62870911 0.24568903 0.33896561  
0.47006297 0.95629456 0.19952982  
0.35310045 0.02940571 0.18383272  
0.34711598 0.64280362 0.33950276  
0.38470298 0.59583742 0.39778115  
0.92611772 0.47870521 0.35833971  
0.87400171 0.58583339 0.37570097  
0.11443284 1.00970286 0.18056053  
0.18324977 0.07687967 0.13757106  
1.03192911 0.84201448 0.19969727  
0.93361098 0.90286118 0.16135971  
0.31271179 0.54944057 0.18478916

0.22506773 0.43764293 0.17647263  
0.08904223 0.10867426 0.45110186  
0.05604674 -0.00384663 0.47299092  
0.36870774 0.52807895 0.48643881  
0.42042640 0.43789369 0.44753609  
1.02537007 0.72794938 0.25129609  
0.12625521 0.82095949 0.25851660  
0.93692757 0.16240164 0.39510103  
1.02270724 0.26922139 0.40661806  
0.61638121 0.50336428 0.47457750  
0.74131206 0.50860955 0.51523390  
0.44962196 0.21969579 0.16312766  
0.52030780 0.26452315 0.21900974  
0.07311800 0.38394263 0.12088923  
0.06993068 0.34000004 0.17664356  
0.23118948 0.64386737 0.26659674  
0.28615972 0.53233180 0.26149239  
0.41531073 0.35736557 0.37458640  
0.35947484 0.27268812 0.40621474  
0.61390701 0.78496843 0.22203340  
0.74471863 0.75324718 0.26066990  
0.57741037 0.23780097 0.53153729  
0.57534190 0.15873777 0.57743683  
0.49545193 0.43193776 0.55000000

#### At -0.4 V vs RHE

Frame 683 extracted from XDATCAR  
1.0  
9.824384 0.0 0.0  
0.0 12.762371 0.0  
0.0 0.0 25.5  
C N Mo O H He  
42 4 1 40 80 1  
Direct  
0.12170330 0.31902779 0.04095263  
0.12286877 0.65275731 0.04205020  
0.12433451 0.98599241 0.04273894  
0.37050883 0.64812565 0.05190071  
0.37502911 0.98665844 0.04713208  
0.62662565 0.64812565 0.05190071  
0.62210425 0.98665844 0.04713208  
0.87542995 0.31902779 0.04095263  
0.87426540 0.65275731 0.04205020  
0.87279864 0.98599241 0.04273894  
0.12289117 0.20775850 0.04214176  
0.12172784 0.54144242 0.04089157  
0.12433665 0.87453193 0.04270788  
0.37053326 0.21237355 0.05197314  
0.37500865 0.87387391 0.04710267  
0.62660010 0.21237355 0.05197314  
0.62212552 0.87387391 0.04710267  
0.87424219 0.20775850 0.04214176  
0.87540552 0.54144242 0.04089157  
0.87279793 0.87453193 0.04270788  
0.99856693 0.15210113 0.04118694  
0.99856693 0.48543182 0.03793733  
0.99856693 0.81974572 0.04190933

0.24862841 0.15363603 0.04551278  
0.24346056 0.48654682 0.04794792  
0.24972161 0.81868808 0.04476129  
0.49856673 0.15832176 0.05229408  
0.49856673 0.81565581 0.04898659  
0.74850606 0.15363603 0.04551278  
0.75367280 0.48654682 0.04794792  
0.74741276 0.81868808 0.04476129  
0.99856693 0.04077957 0.04196314  
0.99856693 0.37503776 0.03797400  
0.99856693 0.70842792 0.04110027  
0.24973169 0.04180156 0.04481710  
0.24344946 0.37398153 0.04797357  
0.24864969 0.70687727 0.04543039  
0.49856673 0.04486807 0.04904224  
0.49856673 0.70218692 0.05221804  
0.74740157 0.04180156 0.04481710  
0.75368390 0.37398153 0.04797357  
0.74848469 0.70687727 0.04543039  
0.36177535 0.31960911 0.05808553  
0.63535902 0.31960911 0.05808553  
0.63534060 0.54092848 0.05803294  
0.36179266 0.54092848 0.05803294  
0.49172265 0.42238646 0.14713869  
0.04624713 0.85098289 0.32633918  
0.13928218 0.02285127 0.28982975  
0.79320301 0.47433300 0.24352671  
0.58624315 0.02453935 0.17094374  
0.51731571 0.31943231 0.19096379  
0.80819234 0.07634700 0.38059360  
0.53992548 0.82528834 0.22446643  
0.94082310 0.14369385 0.29929792  
0.63231729 0.16386944 0.60300045  
0.59595499 0.27893727 0.31565389  
0.29651219 0.82262663 0.16861211  
0.46982608 0.47514452 0.33601207  
0.17727783 0.64483875 0.20333672  
0.36756431 0.04006386 0.39791237  
0.12985865 0.91293411 0.42163516  
0.87485375 0.78821739 0.47203058  
0.34147887 0.14020739 0.29778361  
0.20768407 0.34945770 0.31041148  
0.78266186 0.15587222 0.19773013  
0.75025200 0.32773114 0.41221753  
0.94693431 0.58514029 0.16950344  
0.37290137 0.13251525 0.57079906  
0.39210233 0.15546281 0.20177765  
0.10920681 -0.01395530 0.18583208  
0.12506513 0.69823791 0.45121088  
0.88550643 0.48530850 0.33393566  
0.87757356 0.90927607 0.22592290  
0.76799379 0.75152954 0.16979084  
0.44548926 0.53661498 0.18306850  
0.92375505 0.99047655 0.50256538  
0.34941955 0.62474910 0.49614997  
0.15114357 0.69549441 0.29563706  
0.75768582 0.19112730 0.48690022  
0.59748275 0.96543790 0.33350111  
0.02408453 0.16587309 0.16537861  
0.15636516 0.36163695 0.20728861  
0.13940478 0.55084288 0.36713629  
0.49124378 0.42623072 0.43930370

0.60923630 0.61256850 0.25162356  
0.42739745 0.19314169 0.46634151  
0.07914330 0.91176554 0.30654839  
0.06453869 0.86616213 0.36304737  
0.14883933 0.01083654 0.25133462  
0.05171293 0.07395190 0.29545648  
0.85760411 0.46353222 0.29879677  
0.74729498 0.41879342 0.22843917  
0.57478575 0.88831468 0.20639997  
0.59398021 0.00103712 0.13459036  
0.44777616 0.22785706 0.19773560  
0.74860468 0.22773992 0.19834157  
0.74494801 0.12891143 0.39383544  
0.74490788 0.02213008 0.36454551  
0.34655164 0.04840895 0.56693068  
0.62095517 0.68911114 0.40287190  
0.88056479 0.11659196 0.32822249  
0.88447809 0.14381013 0.26819595  
0.14612975 0.84769402 0.44096909  
0.63326869 0.68682081 0.25503765  
0.55872282 0.21030845 0.32371543  
0.65303360 0.29394232 0.34664670  
0.31691698 0.80909773 0.13246145  
0.44534283 0.81583065 0.20864546  
0.50635409 0.40952265 0.31970152  
0.51066413 0.52506783 0.30909698  
0.09872293 0.61075607 0.18705956  
0.24885906 0.75418315 0.18132945  
0.40459310 0.13881595 0.43816545  
0.51854845 0.95991952 0.35529318  
0.06750476 0.94962686 0.44539468  
0.27786602 1.00650719 0.40488229  
0.80468374 0.73484075 0.46726822  
-0.03543178 0.74920454 0.47557847  
0.35554781 0.07781470 0.36235236  
0.25463058 0.09863847 0.29573246  
0.29871000 0.21416423 0.30133641  
0.11435404 0.33641433 0.32312470  
0.87396935 0.16146587 0.17860437  
0.66547996 0.07515503 0.17688529  
0.67087557 0.36310369 0.42321202  
0.77637852 0.27624034 0.44163111  
0.90261451 0.52985256 0.19320301  
0.93467594 0.55789990 0.13383843  
0.54798136 0.12377611 0.59731741  
0.59142732 0.21685246 0.62514363  
0.46541760 0.09989688 0.18966027  
0.37190544 0.14527482 0.24296481  
0.17321796 0.92959473 0.17441139  
0.01961173 0.95402192 0.19835116  
0.11365228 0.65941452 0.41633096  
0.21214239 0.66996068 0.46702245  
0.85037290 0.44430753 0.36235562  
0.04671002 0.51385518 0.35525243  
0.84393694 0.84495995 0.20638427  
0.88913498 0.87846049 0.26074837  
0.80744583 0.68101006 0.16596040  
0.66808049 0.74881629 0.17083352  
0.24724970 0.58766820 0.20462822  
0.23258387 0.37523423 0.18272533  
0.88077965 0.92326328 0.49065805  
-0.09142429 0.99138816 0.54050569

0.30434945 0.58313142 0.52309721  
 0.40021060 0.57019567 0.48089305  
 0.15034597 0.66979670 0.25700517  
 0.09031674 0.76997295 0.30836790  
 0.81499830 0.12869237 0.48581427  
 0.73482274 0.20331244 0.52394045  
 0.57523011 0.93482692 0.29841212  
 0.65042718 0.63542747 0.39708511  
 0.03329483 0.17731091 0.12744490  
 0.06669357 0.08980950 0.17048483  
 0.11574991 0.29423590 0.19525868

0.19459279 0.35875159 0.27140324  
 0.15992515 0.63752883 0.32392427  
 0.21407871 0.50418767 0.35279693  
 0.49141119 0.44677741 0.40014332  
 0.45854915 0.35767733 0.43945465  
 0.53064137 0.60741791 0.23028922  
 0.72540443 0.53983380 0.24875574  
 0.52526479 0.19195205 0.47003582  
 0.39538547 0.15252524 0.53534160  
 0.49545193 0.43193776 0.55000000

## The Initial coordinates of the \*NH<sub>2</sub> on the MoN<sub>4</sub>/H<sub>2</sub>O interface during the SG-AIMG

### At o V vs RHE

C  
 1.0  
 9.824384 0.0 0.0  
 0.0 12.762371 0.0  
 0.0 0.0 25.0  
 C N Mo H O  
 42 5 1 83 40  
 Selective dynamics  
 Cartesian  
 1.128620 3.571834 1.123043 F F F  
 1.139290 7.831985 1.173802 F F F  
 1.153170 12.086745 1.216262 F F F  
 3.578231 7.767404 1.404418 F F F  
 3.615151 12.096142 1.329628 F F F  
 6.082321 7.767404 1.404418 F F F  
 6.045401 12.096142 1.329628 F F F  
 8.531930 3.571834 1.123043 F F F  
 8.521249 7.831985 1.173802 F F F  
 8.507382 12.086745 1.216262 F F F  
 1.139320 2.156674 1.173241 F F F  
 1.128741 6.416654 1.123642 F F F  
 1.153220 10.664243 1.216145 F F F  
 3.578231 2.221464 1.402227 F F F  
 3.615212 10.654943 1.329783 F F F  
 6.082321 2.221464 1.402227 F F F  
 6.045340 10.654943 1.329783 F F F  
 8.521232 2.156674 1.173241 F F F  
 8.531809 6.416654 1.123642 F F F  
 8.507321 10.664243 1.216145 F F F  
 9.742464 1.444994 1.160057 F F F  
 9.742464 5.700932 1.049884 F F F  
 9.742464 9.966444 1.191449 F F F  
 2.380030 1.467324 1.269097 F F F  
 2.330011 5.706925 1.268651 F F F  
 2.387990 9.947744 1.267566 F F F  
 4.830271 1.527073 1.425394 F F F  
 4.830271 9.913444 1.371458 F F F  
 7.280521 1.467324 1.269097 F F F  
 7.330538 5.706925 1.268651 F F F  
 7.272561 9.947744 1.267566 F F F  
 9.742464 0.022247 1.191690 F F F  
 9.742464 4.287605 1.049792 F F F  
 9.742464 8.543544 1.160052 F F F

2.388030 0.040930 1.267375 F F F  
 2.330181 4.281594 1.267675 F F F  
 2.380181 8.521294 1.270158 F F F  
 4.830271 0.075401 1.370925 F F F  
 4.830271 8.461704 1.427069 F F F  
 7.272511 0.040930 1.267375 F F F  
 7.330362 4.281594 1.267675 F F F  
 7.280360 8.521294 1.270158 F F F  
 3.506161 3.602114 1.500305 F F F  
 6.154389 3.602114 1.500305 F F F  
 6.154361 6.386294 1.503373 F F F  
 3.506191 6.386294 1.503373 F F F  
 4.981054 5.191304 4.222055 T T T  
 4.830271 4.993834 2.243284 F F F  
 4.188683 5.310773 4.835322 T T T  
 5.737650 4.742418 4.793166 T T T  
 4.223842 5.567493 11.071210 T T T  
 3.699904 7.836371 10.197899 T T T  
 0.301700 7.980719 9.996396 T T T  
 4.094494 6.747138 7.094540 T T T  
 2.577256 2.822992 10.659494 T T T  
 3.870119 1.853170 10.825474 T T T  
 4.386713 9.649922 9.215067 T T T  
 3.204816 10.060800 10.323192 T T T  
 5.538097 8.736001 7.649890 T T T  
 4.503438 9.809992 6.944955 T T T  
 6.952727 11.901425 9.880279 T T T  
 7.492731 12.133813 11.352346 T T T  
 9.445427 3.112794 7.067687 T T T  
 0.921480 2.559847 6.329221 T T T  
 5.584325 0.426773 7.530723 T T T  
 4.234885 0.362531 6.867512 T T T  
 0.211148 1.065254 7.873501 T T T  
 0.883702 12.541073 8.074581 T T T  
 0.862992 7.811609 11.496681 T T T  
 2.517642 6.868455 10.453638 T T T  
 3.104920 3.625397 6.355751 T T T  
 2.105300 3.977899 5.190389 T T T  
 8.296000 9.723591 8.265149 T T T  
 0.055303 9.685574 8.147983 T T T  
 8.410424 4.413616 4.790020 T T T  
 8.595475 5.819297 4.211810 T T T  
 8.303833 7.552088 5.982581 T T T  
 8.657995 7.928978 7.509863 T T T  
 7.013199 9.173326 11.471720 T T T

5.585143 9.166276 10.854670 T T T  
 6.788607 2.960403 4.881008 T T T  
 7.225941 3.471594 6.403158 T T T  
 8.943346 10.129688 5.039671 T T T  
 8.663093 11.628534 5.500169 T T T  
 2.773584 0.142775 5.154758 T T T  
 2.998577 1.670565 5.393808 T T T  
 7.102849 0.325391 5.501993 T T T  
 8.438899 0.778452 6.265362 T T T  
 7.452527 1.194020 10.432626 T T T  
 8.223443 2.517205 10.946868 T T T  
 2.183597 8.074685 3.609596 T T T  
 1.911765 6.968681 4.772582 T T T  
 2.710817 10.710830 5.112135 T T T  
 2.752814 9.192289 5.307881 T T T  
 6.754415 6.925179 10.818500 T T T  
 7.637584 5.727948 10.239336 T T T  
 5.132212 7.461700 4.597252 T T T  
 4.938149 8.993603 4.644793 T T T  
 6.968579 2.840375 8.958963 T T T  
 5.819316 3.591599 8.072959 T T T  
 3.953500 3.602213 8.737972 T T T  
 3.834167 5.035203 8.012296 T T T  
 1.042647 11.323702 10.653730 T T T  
 2.582384 11.891214 10.594448 T T T  
 0.619209 11.385077 4.331069 T T T  
 1.677136 12.310436 3.540273 T T T  
 4.768138 12.658221 10.831174 T T T  
 4.305497 0.334824 9.421237 T T T  
 7.324294 8.313295 4.360230 T T T  
 8.627565 8.231338 3.509644 T T T  
 6.545953 6.886554 7.296211 T T T  
 5.994465 6.661321 8.840497 T T T  
 0.128483 5.847820 10.633615 T T T  
 9.259131 4.998018 9.346683 T T T  
 1.093533 2.024613 9.475813 T T T  
 0.391200 3.430387 10.068343 T T T  
 8.968923 10.919999 10.017517 T T T  
 9.460397 12.287304 9.723163 T T T  
 5.629723 4.979892 11.082689 T T T  
 4.117443 3.824935 11.156139 T T T  
 0.400659 5.269270 4.990575 T T T  
 1.345995 5.665993 6.170737 T T T  
 5.177453 0.936569 4.411985 T T T  
 6.399837 0.911751 3.433204 T T T  
 1.707420 10.953888 8.685999 T T T  
 2.023133 10.565886 7.095100 T T T  
 6.485504 10.574099 7.860015 T T T  
 7.626365 11.770970 7.728229 T T T  
 8.653830 5.753823 7.454430 T T T  
 7.889838 4.386948 8.146916 T T T  
 3.148380 6.696850 8.361821 T T T  
 3.461702 6.871315 10.178079 T T T  
 3.165040 6.508910 7.386408 T T T  
 3.524045 2.799655 10.815070 T T T  
 4.129603 9.478168 10.121696 T T T  
 5.201458 9.671278 7.642152 T T T  
 6.789316 12.444882 10.688689 T T T  
 9.814246 2.292778 6.667735 T T T  
 4.703814 0.109432 7.761352 T T T  
 0.330659 0.411091 8.587236 T T T  
 0.978647 7.464751 10.554573 T T T

2.477540 3.227776 5.774495 T T T  
 9.093203 9.132239 8.420671 T T T  
 9.075970 4.978661 4.292787 T T T  
 8.211986 7.237966 6.916440 T T T  
 6.487763 8.762032 10.761164 T T T  
 7.095023 3.731041 5.401628 T T T  
 9.041144 11.026124 4.800621 T T T  
 3.515126 0.810590 5.346903 T T T  
 7.803946 12.761845 6.175828 T T T  
 7.803222 2.072673 10.163658 T T T  
 2.155882 7.958213 4.557656 T T T  
 3.106696 10.025327 5.716669 T T T  
 6.757795 6.031436 10.366184 T T T  
 5.572494 8.272719 4.832142 T T T  
 6.766259 3.328479 8.138795 T T T  
 4.106859 4.047019 7.917650 T T T  
 2.031513 11.097975 10.393623 T T T  
 1.535340 11.885290 4.427272 T T T  
 4.023368 0.337910 10.452355 T T T  
 8.298371 8.313534 4.443306 T T T  
 5.768717 6.744175 7.874532 T T T  
 9.485772 4.978083 10.356025 T T T  
 1.125982 2.758023 10.163505 T T T  
 9.390659 11.619946 10.486633 T T T  
 4.710987 4.788533 11.493843 T T T  
 1.437996 5.403635 5.205954 T T T  
 6.119475 1.139707 4.293877 T T T  
 1.345203 10.902318 7.725468 T T T  
 7.311974 11.019897 8.295527 T T T  
 8.772881 4.837497 7.872806 T T T

**At -0.2 V vs RHE**

C  
 1.0  
 9.824384 0.0 0.0  
 0.0 12.762371 0.0  
 0.0 0.0 25.0  
 C N Mo H O  
 42 5 1 83 40  
 Selective dynamics  
 Cartesain  
 1.128620 3.571834 1.123043 F F F  
 1.139290 7.831985 1.173802 F F F  
 1.153170 12.086745 1.216262 F F F  
 3.578231 7.767404 1.404418 F F F  
 3.615151 12.096142 1.329628 F F F  
 6.082321 7.767404 1.404418 F F F  
 6.045401 12.096142 1.329628 F F F  
 8.531930 3.571834 1.123043 F F F  
 8.521249 7.831985 1.173802 F F F  
 8.507382 12.086745 1.216262 F F F  
 1.139320 2.156674 1.173241 F F F  
 1.128741 6.416654 1.123642 F F F  
 1.153220 10.664243 1.216145 F F F  
 3.578231 2.221464 1.402227 F F F  
 3.615212 10.654943 1.329783 F F F  
 6.082321 2.221464 1.402227 F F F  
 6.045340 10.654943 1.329783 F F F  
 8.521232 2.156674 1.173241 F F F  
 8.531809 6.416654 1.123642 F F F  
 8.507321 10.664243 1.216145 F F F

|          |           |           |       |          |           |           |       |
|----------|-----------|-----------|-------|----------|-----------|-----------|-------|
| 9.742464 | 1.444994  | 1.160057  | F F F | 9.488158 | 9.337625  | 4.828073  | T T T |
| 9.742464 | 5.700932  | 1.049884  | F F F | 9.330915 | 10.889931 | 5.357821  | T T T |
| 9.742464 | 9.966444  | 1.191449  | F F F | 2.825860 | 12.478200 | 4.998046  | T T T |
| 2.380030 | 1.467324  | 1.269097  | F F F | 3.052617 | 1.236499  | 5.253131  | T T T |
| 2.330011 | 5.706925  | 1.268651  | F F F | 7.520856 | 12.175643 | 5.807115  | T T T |
| 2.387990 | 9.947744  | 1.267566  | F F F | 8.754246 | 0.154840  | 6.078494  | T T T |
| 4.830271 | 1.527073  | 1.425394  | F F F | 7.094902 | 1.437764  | 10.374936 | T T T |
| 4.830271 | 9.913444  | 1.371458  | F F F | 8.283811 | 2.520813  | 10.281134 | T T T |
| 7.280521 | 1.467324  | 1.269097  | F F F | 2.508144 | 7.628156  | 3.569962  | T T T |
| 7.330538 | 5.706925  | 1.268651  | F F F | 2.009031 | 6.760526  | 4.651029  | T T T |
| 7.272561 | 9.947744  | 1.267566  | F F F | 3.420969 | 10.200404 | 4.925411  | T T T |
| 9.742464 | 0.022247  | 1.191690  | F F F | 3.488915 | 8.797070  | 5.230723  | T T T |
| 9.742464 | 4.287605  | 1.049792  | F F F | 7.037986 | 7.185627  | 10.454986 | T T T |
| 9.742464 | 8.543544  | 1.160052  | F F F | 7.669544 | 5.628038  | 10.318896 | T T T |
| 2.388030 | 0.040930  | 1.267375  | F F F | 5.641136 | 6.866286  | 4.313175  | T T T |
| 2.330181 | 4.281594  | 1.267675  | F F F | 5.590447 | 8.367058  | 4.883161  | T T T |
| 2.380181 | 8.521294  | 1.270158  | F F F | 6.086286 | 2.488552  | 8.652206  | T T T |
| 4.830271 | 0.075401  | 1.370925  | F F F | 4.861931 | 3.130252  | 7.684308  | T T T |
| 4.830271 | 8.461704  | 1.427069  | F F F | 3.261679 | 3.450436  | 9.021930  | T T T |
| 7.272511 | 0.040930  | 1.267375  | F F F | 3.293505 | 4.820600  | 7.970685  | T T T |
| 7.330362 | 4.281594  | 1.267675  | F F F | 1.680114 | 11.432458 | 10.632607 | T T T |
| 7.280360 | 8.521294  | 1.270158  | F F F | 3.121995 | 11.928954 | 10.318714 | T T T |
| 3.506161 | 3.602114  | 1.500305  | F F F | 1.346476 | 10.793595 | 4.330439  | T T T |
| 6.154389 | 3.602114  | 1.500305  | F F F | 2.352350 | 11.490559 | 3.302051  | T T T |
| 6.154361 | 6.386294  | 1.503373  | F F F | 5.150384 | 0.104212  | 10.815096 | T T T |
| 3.506191 | 6.386294  | 1.503373  | F F F | 4.454106 | 0.362847  | 9.419666  | T T T |
| 4.669547 | 4.871287  | 4.138152  | T T T | 7.827248 | 7.724125  | 4.224390  | T T T |
| 4.830271 | 4.993834  | 2.243284  | F F F | 9.241076 | 7.315744  | 3.715299  | T T T |
| 4.035429 | 5.120059  | 4.874871  | T T T | 6.886644 | 6.460256  | 7.112052  | T T T |
| 5.527261 | 4.391745  | 4.407274  | T T T | 6.060268 | 6.401201  | 8.467238  | T T T |
| 3.567487 | 5.982601  | 10.619231 | T T T | 9.726179 | 5.787499  | 10.316528 | T T T |
| 3.580547 | 7.626901  | 10.146197 | T T T | 9.198464 | 4.809700  | 9.141474  | T T T |
| 0.354387 | 8.140995  | 9.914947  | T T T | 0.819303 | 2.010383  | 9.703138  | T T T |
| 4.392831 | 6.475414  | 7.216400  | T T T | 0.285709 | 3.290058  | 10.566463 | T T T |
| 2.575733 | 2.671977  | 10.783651 | T T T | 9.275543 | 10.912493 | 10.519306 | T T T |
| 3.913813 | 1.839621  | 10.850649 | T T T | 9.797808 | 12.158326 | 9.774619  | T T T |
| 4.346034 | 9.309323  | 9.047894  | T T T | 5.328115 | 5.189249  | 10.704364 | T T T |
| 3.695541 | 9.764318  | 10.380518 | T T T | 4.121195 | 4.250681  | 11.119689 | T T T |
| 5.774829 | 8.611197  | 7.700604  | T T T | 0.121215 | 4.941597  | 4.578099  | T T T |
| 4.910015 | 9.428389  | 6.845132  | T T T | 0.762799 | 5.372687  | 5.914439  | T T T |
| 7.298411 | 12.011644 | 9.949283  | T T T | 5.143453 | 12.759080 | 5.070838  | T T T |
| 7.631176 | 12.428587 | 11.475150 | T T T | 6.064591 | 12.255401 | 3.909144  | T T T |
| 9.090805 | 2.569533  | 6.959236  | T T T | 2.323319 | 10.542547 | 8.826274  | T T T |
| 0.514351 | 1.901611  | 6.183040  | T T T | 2.962026 | 9.777945  | 7.610703  | T T T |
| 5.201379 | 0.785313  | 7.494619  | T T T | 6.871313 | 10.504411 | 8.278152  | T T T |
| 4.033646 | 12.581609 | 7.245452  | T T T | 7.891860 | 11.525620 | 7.911129  | T T T |
| 0.046426 | 0.802654  | 7.904786  | T T T | 8.385295 | 4.964785  | 7.280060  | T T T |
| 1.219933 | 12.553982 | 7.960542  | T T T | 7.551173 | 3.682397  | 7.806540  | T T T |
| 0.716863 | 7.773427  | 11.445642 | T T T | 3.026713 | 7.055405  | 7.452801  | T T T |
| 2.107916 | 7.012968  | 10.289472 | T T T | 3.105391 | 6.732232  | 10.006189 | T T T |
| 2.566174 | 2.886298  | 6.524529  | T T T | 3.494231 | 6.425852  | 6.865007  | T T T |
| 1.734179 | 3.464301  | 5.261331  | T T T | 3.549676 | 2.814790  | 10.672009 | T T T |
| 9.108426 | 9.626528  | 8.524079  | T T T | 4.306739 | 9.019626  | 10.011407 | T T T |
| 0.661085 | 9.237368  | 8.027627  | T T T | 5.420373 | 9.514550  | 7.703599  | T T T |
| 7.861745 | 3.828621  | 4.457816  | T T T | 7.018671 | 12.590589 | 10.739004 | T T T |
| 7.951188 | 5.261320  | 3.703119  | T T T | 9.459360 | 1.690823  | 6.605356  | T T T |
| 8.616232 | 7.036822  | 6.079578  | T T T | 4.744258 | 12.719326 | 6.78948   | T T T |
| 9.050333 | 7.491789  | 7.557938  | T T T | 0.592370 | 0.262568  | 8.561697  | T T T |
| 7.244591 | 8.984649  | 11.656424 | T T T | 0.737095 | 7.376279  | 10.522183 | T T T |
| 6.169279 | 9.086063  | 10.502056 | T T T | 1.944859 | 2.664255  | 5.783802  | T T T |
| 6.548006 | 1.731355  | 4.805279  | T T T | 9.686717 | 8.801364  | 8.500816  | T T T |
| 6.421742 | 2.838190  | 5.853713  | T T T | 8.351694 | 4.746763  | 4.435930  | T T T |

|          |           |           |       |
|----------|-----------|-----------|-------|
| 8.574580 | 6.740587  | 6.986637  | T T T |
| 7.153972 | 8.856876  | 10.686826 | T T T |
| 6.710027 | 2.702104  | 4.935651  | T T T |
| 0.147142 | 10.170750 | 5.046904  | T T T |
| 3.411856 | 0.354536  | 5.490276  | T T T |
| 8.468569 | 12.000427 | 6.143423  | T T T |
| 7.322327 | 2.355549  | 10.061801 | T T T |
| 2.180619 | 7.673563  | 4.496289  | T T T |
| 3.982155 | 9.619450  | 5.462104  | T T T |
| 6.933315 | 6.252297  | 10.135940 | T T T |
| 6.193816 | 7.637292  | 4.570619  | T T T |
| 5.721371 | 2.608697  | 7.772029  | T T T |
| 3.399262 | 3.818288  | 8.077450  | T T T |
| 2.552723 | 11.129693 | 10.288797 | T T T |
| 2.253217 | 11.118877 | 4.176379  | T T T |
| 4.315959 | 0.342907  | 10.416188 | T T T |
| 8.756214 | 7.836519  | 4.402406  | T T T |
| 5.922926 | 6.681299  | 7.495917  | T T T |
| 9.242285 | 4.958600  | 10.186550 | T T T |
| 0.900922 | 2.466280  | 10.555298 | T T T |
| 0.058180 | 11.621176 | 10.628543 | T T T |
| 4.454781 | 5.174053  | 11.172837 | T T T |
| 1.022188 | 5.116640  | 5.028040  | T T T |
| 6.104678 | 12.596441 | 4.784931  | T T T |
| 2.076587 | 10.044428 | 7.934656  | T T T |
| 7.709586 | 10.895835 | 8.660327  | T T T |
| 8.464675 | 4.052662  | 7.646786  | T T T |

|          |           |           |       |
|----------|-----------|-----------|-------|
| 2.380030 | 1.467324  | 1.269097  | F F F |
| 2.330011 | 5.706925  | 1.268651  | F F F |
| 2.387990 | 9.947744  | 1.267566  | F F F |
| 4.830271 | 1.527073  | 1.425394  | F F F |
| 4.830271 | 9.913444  | 1.371458  | F F F |
| 7.280521 | 1.467324  | 1.269097  | F F F |
| 7.330538 | 5.706925  | 1.268651  | F F F |
| 7.272561 | 9.947744  | 1.267566  | F F F |
| 9.742464 | 0.022247  | 1.191690  | F F F |
| 9.742464 | 4.287605  | 1.049792  | F F F |
| 9.742464 | 8.543544  | 1.160052  | F F F |
| 2.388030 | 0.040930  | 1.267375  | F F F |
| 2.330181 | 4.281594  | 1.267675  | F F F |
| 2.380181 | 8.521294  | 1.270158  | F F F |
| 4.830271 | 0.075401  | 1.370925  | F F F |
| 4.830271 | 8.461704  | 1.427069  | F F F |
| 7.272511 | 0.040930  | 1.267375  | F F F |
| 7.330362 | 4.281594  | 1.267675  | F F F |
| 7.280360 | 8.521294  | 1.270158  | F F F |
| 3.506161 | 3.602114  | 1.500305  | F F F |
| 6.154389 | 3.602114  | 1.500305  | F F F |
| 6.154361 | 6.386294  | 1.503373  | F F F |
| 3.506191 | 6.386294  | 1.503373  | F F F |
| 4.888199 | 5.022514  | 4.197377  | T T T |
| 4.830271 | 4.993834  | 2.243284  | F F F |
| 4.092487 | 5.362374  | 4.760690  | T T T |
| 5.537471 | 4.332268  | 4.682124  | T T T |
| 4.556708 | 5.289885  | 11.156396 | T T T |
| 4.065150 | 7.321414  | 10.949249 | T T T |
| 0.987172 | 6.699723  | 9.918040  | T T T |
| 4.371461 | 6.342336  | 8.215148  | T T T |
| 2.529772 | 2.394098  | 10.350142 | T T T |
| 3.701720 | 1.267221  | 10.623004 | T T T |
| 5.463850 | 9.015374  | 10.108865 | T T T |
| 5.698839 | 9.366934  | 11.608544 | T T T |
| 7.502366 | 8.261682  | 6.779471  | T T T |
| 6.112730 | 8.594391  | 7.353822  | T T T |
| 7.021468 | 11.779196 | 9.694183  | T T T |
| 7.452386 | 11.313313 | 11.078352 | T T T |
| 9.798168 | 2.467270  | 6.876325  | T T T |
| 0.943327 | 2.296595  | 5.579949  | T T T |
| 5.997001 | 11.688762 | 7.913117  | T T T |
| 4.866894 | 12.334970 | 7.004150  | T T T |
| 1.573708 | 0.896907  | 7.365385  | T T T |
| 2.475076 | 12.304789 | 7.474801  | T T T |
| 0.831915 | 6.121883  | 11.400089 | T T T |
| 2.949659 | 6.315562  | 10.947531 | T T T |
| 3.047972 | 3.070599  | 5.924009  | T T T |
| 2.955571 | 3.713752  | 4.528110  | T T T |
| 9.509801 | 8.292835  | 9.110640  | T T T |
| 0.760766 | 9.122911  | 8.343838  | T T T |
| 8.616028 | 4.325657  | 4.894710  | T T T |
| 9.716346 | 3.733526  | 3.847435  | T T T |
| 9.392796 | 6.421652  | 6.192957  | T T T |
| 0.121830 | 6.848073  | 7.604722  | T T T |
| 8.854256 | 8.046630  | 11.127020 | T T T |
| 7.415282 | 8.382272  | 10.547367 | T T T |
| 6.946409 | 2.322181  | 5.021659  | T T T |
| 6.987033 | 2.970104  | 6.349575  | T T T |
| 9.041562 | 8.948715  | 4.509927  | T T T |
| 8.959522 | 10.341687 | 5.287685  | T T T |
| 3.195971 | 12.625691 | 5.204230  | T T T |

#### At -0.4 V vs RHE

C

1.0  
9.824384 0.0 0.0  
0.0 12.762371 0.0

0.0 0.0 25.0

C N Mo H O

42 5 1 83 40

Selective dynamics

Cartesian

|          |           |          |       |
|----------|-----------|----------|-------|
| 1.128620 | 3.571834  | 1.123043 | F F F |
| 1.139290 | 7.831985  | 1.173802 | F F F |
| 1.153170 | 12.086745 | 1.216262 | F F F |
| 3.578231 | 7.767404  | 1.404418 | F F F |
| 3.615151 | 12.096142 | 1.329628 | F F F |
| 6.082321 | 7.767404  | 1.404418 | F F F |
| 6.045401 | 12.096142 | 1.329628 | F F F |
| 8.531930 | 3.571834  | 1.123043 | F F F |
| 8.521249 | 7.831985  | 1.173802 | F F F |
| 8.507382 | 12.086745 | 1.216262 | F F F |
| 1.139320 | 2.156674  | 1.173241 | F F F |
| 1.128741 | 6.416654  | 1.123642 | F F F |
| 1.153220 | 10.664243 | 1.216145 | F F F |
| 3.578231 | 2.221464  | 1.402227 | F F F |
| 3.615212 | 10.654943 | 1.329783 | F F F |
| 6.082321 | 2.221464  | 1.402227 | F F F |
| 6.045340 | 10.654943 | 1.329783 | F F F |
| 8.521232 | 2.156674  | 1.173241 | F F F |
| 8.531809 | 6.416654  | 1.123642 | F F F |
| 8.507321 | 10.664243 | 1.216145 | F F F |
| 9.742464 | 1.444994  | 1.160057 | F F F |
| 9.742464 | 5.700932  | 1.049884 | F F F |
| 9.742464 | 9.966444  | 1.191449 | F F F |

|          |           |           |       |          |           |           |       |
|----------|-----------|-----------|-------|----------|-----------|-----------|-------|
| 3.544441 | 1.493027  | 5.370026  | T T T | 3.419331 | 7.594052  | 8.020002  | T T T |
| 7.800068 | 0.055923  | 5.481615  | T T T | 3.887479 | 6.398755  | 10.757233 | T T T |
| 9.248449 | 0.337662  | 5.964203  | T T T | 3.472468 | 6.647002  | 7.887228  | T T T |
| 7.271632 | 0.792161  | 10.453980 | T T T | 3.502574 | 2.264544  | 10.539933 | T T T |
| 8.461182 | 1.494656  | 9.800833  | T T T | 5.757646 | 8.657766  | 10.958977 | T T T |
| 1.707731 | 8.581195  | 4.237908  | T T T | 7.076903 | 8.758566  | 7.556809  | T T T |
| 2.403237 | 7.354282  | 4.863863  | T T T | 6.804696 | 11.924877 | 10.656810 | T T T |
| 4.902006 | 10.035844 | 3.757013  | T T T | 0.472926 | 1.818022  | 6.321086  | T T T |
| 3.988791 | 8.990270  | 4.559544  | T T T | 5.019273 | 11.901426 | 7.883585  | T T T |
| 7.799536 | 4.327379  | 11.399455 | T T T | 2.090396 | 0.287048  | 7.974582  | T T T |
| 7.419570 | 3.115881  | 10.418378 | T T T | 1.387360 | 6.037872  | 10.569438 | T T T |
| 5.694355 | 6.734254  | 4.942482  | T T T | 2.678205 | 2.930468  | 5.034555  | T T T |
| 5.854069 | 8.292913  | 5.086457  | T T T | 0.552761 | 8.186801  | 8.618522  | T T T |
| 6.671726 | 2.333449  | 8.589382  | T T T | 9.540044 | 4.412132  | 4.548051  | T T T |
| 5.439729 | 3.200790  | 8.035487  | T T T | 9.649693 | 6.091632  | 7.063898  | T T T |
| 3.050977 | 2.537553  | 8.262564  | T T T | 8.416581 | 8.289765  | 10.304172 | T T T |
| 2.856852 | 4.091049  | 7.799567  | T T T | 7.036258 | 3.215870  | 5.361453  | T T T |
| 1.437698 | 10.294727 | 10.371065 | T T T | 9.366963 | 9.845850  | 4.558319  | T T T |
| 2.826787 | 11.058567 | 10.546285 | T T T | 3.883982 | 0.540205  | 5.464779  | T T T |
| 1.242781 | 10.911379 | 4.240078  | T T T | 8.561500 | 12.337899 | 5.951155  | T T T |
| 2.730103 | 10.696535 | 4.672376  | T T T | 7.528235 | 1.682494  | 10.054012 | T T T |
| 4.976685 | 12.308667 | 10.785872 | T T T | 2.589891 | 8.207464  | 4.407130  | T T T |
| 4.354165 | 12.526715 | 9.406319  | T T T | 4.858658 | 9.537686  | 4.576902  | T T T |
| 7.829305 | 7.131421  | 4.675245  | T T T | 7.205982 | 4.083093  | 10.632042 | T T T |
| 9.210634 | 6.335926  | 4.214296  | T T T | 6.272201 | 7.430441  | 5.304654  | T T T |
| 6.989808 | 6.525964  | 8.242530  | T T T | 6.382849 | 2.922645  | 7.848661  | T T T |
| 6.532400 | 5.338527  | 9.158575  | T T T | 3.059067 | 3.190032  | 7.542313  | T T T |
| 1.211619 | 4.185893  | 10.190458 | T T T | 2.399208 | 10.241852 | 10.382117 | T T T |
| 0.227994 | 3.294609  | 9.623196  | T T T | 1.981618 | 11.365236 | 4.752149  | T T T |
| 0.755929 | 0.357567  | 9.257904  | T T T | 4.095968 | 12.474760 | 10.362586 | T T T |
| 0.579040 | 1.298310  | 10.554551 | T T T | 8.860902 | 7.168404  | 4.664835  | T T T |
| 9.107862 | 10.652276 | 9.944984  | T T T | 6.298644 | 5.794319  | 8.351020  | T T T |
| 9.597893 | 11.900841 | 10.886849 | T T T | 1.011988 | 3.268568  | 10.265343 | T T T |
| 5.965220 | 4.011738  | 11.060038 | T T T | 0.120673 | 0.610597  | 9.983239  | T T T |
| 4.344133 | 3.494506  | 11.298552 | T T T | 9.471810 | 10.910420 | 10.823552 | T T T |
| 1.147811 | 5.439200  | 5.792628  | T T T | 4.931450 | 4.311903  | 11.382723 | T T T |
| 2.530671 | 6.054600  | 6.359586  | T T T | 2.071497 | 5.797863  | 5.518396  | T T T |
| 5.235444 | 0.523406  | 4.767260  | T T T | 6.249538 | 0.509146  | 4.519907  | T T T |
| 6.277030 | 0.534484  | 3.557544  | T T T | 4.462318 | 9.316588  | 8.795966  | T T T |
| 3.622434 | 9.415815  | 9.440012  | T T T | 7.623747 | 11.250455 | 8.099948  | T T T |
| 4.644417 | 10.222866 | 8.500057  | T T T | 9.198368 | 3.767618  | 8.216708  | T T T |
| 7.437053 | 10.301985 | 7.865708  | T T T |          |           |           |       |
| 7.970993 | 11.701719 | 7.294238  | T T T |          |           |           |       |
| 9.562936 | 4.671835  | 7.837111  | T T T |          |           |           |       |
| 8.220114 | 3.911232  | 8.151683  | T T T |          |           |           |       |

### The initial coordinates of the \*N<sub>2</sub> adsorption on the MoN<sub>4</sub>/H<sub>2</sub>O interface during the SG-AIMG

|                    |           |          |       |          |           |          |       |
|--------------------|-----------|----------|-------|----------|-----------|----------|-------|
| C                  |           |          |       | 3.684430 | 12.592101 | 1.201868 | F F F |
| 1.0                |           |          |       | 6.156211 | 8.271620  | 1.323468 | F F F |
| 9.824384           | 0.0 0.0   |          |       | 6.111791 | 12.592101 | 1.201868 | F F F |
| 0.0 12.762371      | 0.0       |          |       | 8.600560 | 4.071551  | 1.044292 | F F F |
| 0.0 0.0 25.5       |           |          |       | 8.589119 | 8.330731  | 1.072280 | F F F |
| C N Mo O H         |           |          |       | 8.574709 | 12.583601 | 1.089843 | F F F |
| 42 6 1 39 79       |           |          |       | 1.207330 | 2.651491  | 1.074615 | F F F |
| Selective dynamics |           |          |       | 1.195901 | 6.910089  | 1.042735 | F F F |
| Cartesian          |           |          |       | 1.221531 | 11.161101 | 1.089051 | F F F |
| 1.195660           | 4.071551  | 1.044292 | F F F | 3.640261 | 2.710390  | 1.325315 | F F F |
| 1.207110           | 8.330731  | 1.072280 | F F F | 3.684229 | 11.152703 | 1.201118 | F F F |
| 1.221510           | 12.583601 | 1.089843 | F F F | 6.155960 | 2.710390  | 1.325315 | F F F |
| 3.640021           | 8.271620  | 1.323468 | F F F | 6.112000 | 11.152703 | 1.201118 | F F F |

|          |           |           |       |          |           |           |       |
|----------|-----------|-----------|-------|----------|-----------|-----------|-------|
| 8.588891 | 2.651491  | 1.074615  | F F F | 2.425901 | 9.509807  | 5.507486  | T T T |
| 8.600320 | 6.910089  | 1.042735  | F F F | 8.154966 | 0.687985  | 10.879870 | T T T |
| 8.574702 | 11.161101 | 1.089051  | F F F | 9.137517 | 6.909671  | 10.818303 | T T T |
| 9.810305 | 1.941171  | 1.050267  | F F F | 2.303312 | 3.790718  | 5.249270  | T T T |
| 9.810305 | 6.195261  | 0.967402  | F F F | 1.733377 | 4.897445  | 7.596224  | T T T |
| 9.810305 | 10.461899 | 1.068688  | F F F | 3.487009 | 8.741402  | 7.814323  | T T T |
| 2.442621 | 1.960760  | 1.160576  | F F F | 3.573079 | 5.274719  | 9.038791  | T T T |
| 2.391850 | 6.209491  | 1.222672  | F F F | 7.122611 | 9.641215  | 7.879786  | T T T |
| 2.453361 | 10.448401 | 1.141413  | F F F | 5.123001 | 3.604705  | 10.149618 | T T T |
| 4.898111 | 2.020561  | 1.333499  | F F F | 0.919032 | 11.902620 | 6.663508  | T T T |
| 4.898111 | 10.409702 | 1.249158  | F F F | 0.642134 | 10.866118 | 7.859379  | T T T |
| 7.353611 | 1.960760  | 1.160576  | F F F | 2.279431 | 0.691574  | 6.136625  | T T T |
| 7.404371 | 6.209491  | 1.222672  | F F F | 1.068707 | 1.058652  | 7.076452  | T T T |
| 7.342870 | 10.448401 | 1.141413  | F F F | 8.744507 | 7.347163  | 7.882723  | T T T |
| 9.810305 | 0.520444  | 1.070060  | F F F | 0.098515 | 8.221951  | 8.146599  | T T T |
| 9.810305 | 4.786371  | 0.968337  | F F F | 6.149559 | 1.431283  | 4.551744  | T T T |
| 9.810305 | 9.041220  | 1.048057  | F F F | 5.575101 | 2.415043  | 3.424016  | T T T |
| 2.453460 | 0.533487  | 1.142836  | F F F | 8.338358 | 5.853726  | 4.580790  | T T T |
| 2.391741 | 4.772891  | 1.223326  | F F F | 9.071854 | 6.321428  | 3.222057  | T T T |
| 2.442830 | 9.021430  | 1.158475  | F F F | 6.764089 | 12.618489 | 8.529761  | T T T |
| 4.898111 | 0.572623  | 1.250577  | F F F | 7.362146 | 11.481346 | 7.740952  | T T T |
| 4.898111 | 8.961570  | 1.331560  | F F F | 6.574501 | 12.606464 | 6.271491  | T T T |
| 7.342760 | 0.533487  | 1.142836  | F F F | 5.932819 | 12.044986 | 4.933816  | T T T |
| 7.404480 | 4.772891  | 1.223326  | F F F | 8.370199 | 1.015606  | 7.342532  | T T T |
| 7.353401 | 9.021430  | 1.158475  | F F F | 8.805584 | 2.023739  | 6.182329  | T T T |
| 3.554220 | 4.078970  | 1.481181  | F F F | 4.856220 | 9.237280  | 10.460295 | T T T |
| 6.242011 | 4.078970  | 1.481181  | F F F | 5.944830 | 9.245915  | 9.293423  | T T T |
| 6.241830 | 6.903530  | 1.479840  | F F F | 6.231116 | 2.849977  | 7.138514  | T T T |
| 3.554390 | 6.903530  | 1.479840  | F F F | 6.139547 | 3.790443  | 8.337834  | T T T |
| 4.617460 | 5.512550  | 5.406000  | T T T | 4.395245 | 10.860062 | 3.360289  | T T T |
| 4.617460 | 5.512550  | 6.502500  | T T T | 3.385546 | 10.836859 | 4.483689  | T T T |
| 4.867510 | 5.512552  | 2.392877  | F F F | 6.779985 | 6.506600  | 8.477851  | T T T |
| 0.693118 | 10.982919 | 6.898390  | T T T | 5.994485 | 6.430541  | 6.461440  | T T T |
| 1.997738 | 0.701767  | 7.089110  | T T T | 4.048979 | 1.350010  | 12.035906 | T T T |
| 9.148712 | 8.141683  | 7.570397  | T T T | 3.107521 | 0.991111  | 10.869038 | T T T |
| 6.000479 | 2.369824  | 4.331320  | T T T | 0.092624 | 10.411998 | 10.210450 | T T T |
| 9.247006 | 6.035772  | 4.161307  | T T T | 1.659407 | 10.149487 | 9.864170  | T T T |
| 7.303685 | 12.491930 | 7.732092  | T T T | 8.317287 | 9.454831  | 12.026097 | T T T |
| 6.671867 | 12.559702 | 5.277084  | T T T | 7.418324 | 9.503633  | 10.734322 | T T T |
| 8.998266 | 1.750214  | 7.135031  | T T T | 4.600199 | 0.733024  | 8.998325  | T T T |
| 5.817672 | 9.340638  | 10.294167 | T T T | 3.635179 | 0.447972  | 7.965889  | T T T |
| 6.461675 | 3.792185  | 7.391265  | T T T | 0.790030 | 4.566876  | 7.902028  | T T T |
| 4.266579 | 11.261488 | 4.270439  | T T T | 8.976659 | 3.261234  | 7.856744  | T T T |
| 5.652395 | 6.844781  | 7.293486  | T T T | 9.144853 | 3.621604  | 4.178908  | T T T |
| 4.112810 | 1.142506  | 11.095241 | T T T | 7.841153 | 2.789005  | 4.215430  | T T T |
| 0.862999 | 10.828643 | 9.731298  | T T T | 8.007618 | 3.574254  | 10.084952 | T T T |
| 8.389026 | 9.611843  | 11.067549 | T T T | 8.032327 | 2.343604  | 11.009521 | T T T |
| 4.582947 | 0.563391  | 8.031522  | T T T | 0.650742 | 6.690582  | 4.929478  | T T T |
| 9.298338 | 4.135593  | 8.257912  | T T T | 1.540692 | 6.498432  | 6.231140  | T T T |
| 8.756271 | 2.798444  | 4.468282  | T T T | 5.919029 | 10.994472 | 10.605109 | T T T |
| 7.618437 | 3.251953  | 10.927620 | T T T | 5.180520 | 12.487145 | 10.831546 | T T T |
| 1.570962 | 6.909314  | 5.315344  | T T T | 6.220567 | 5.502169  | 4.287090  | T T T |
| 6.015683 | 11.990320 | 10.598979 | T T T | 6.807882 | 4.685398  | 5.581677  | T T T |
| 6.779794 | 5.615697  | 5.207926  | T T T | 3.074378 | 0.285118  | 4.147599  | T T T |
| 2.440634 | 0.934175  | 4.535651  | T T T | 1.625950 | 0.590970  | 4.186265  | T T T |
| 3.055326 | 9.052208  | 10.374797 | T T T | 3.184645 | 8.998323  | 9.353266  | T T T |
| 7.615322 | 6.027921  | 8.791591  | T T T | 2.782181 | 8.111628  | 10.555232 | T T T |
| 0.210512 | 12.649403 | 3.946087  | T T T | 8.531344 | 4.916247  | 8.258920  | T T T |
| 8.659868 | 10.650604 | 5.042878  | T T T | 7.819045 | 6.231480  | 9.712206  | T T T |
| 6.121023 | 9.377773  | 5.345327  | T T T | 9.614767 | 11.801725 | 4.280012  | T T T |
| 1.492982 | 0.612270  | 10.688263 | T T T | 9.425151 | 0.653287  | 4.133419  | T T T |
| 2.182424 | 6.493875  | 10.991201 | T T T | 9.246040 | 10.521666 | 5.786468  | T T T |

7.939471 11.258456 5.249082 T T T  
 5.378470 9.896741 5.018949 T T T  
 6.923326 9.534355 4.801518 T T T  
 0.771266 0.681952 11.333576 T T T  
 1.219023 12.495853 10.317780 T T T  
 2.243044 6.251795 11.984053 T T T  
 3.075054 5.793401 9.777966 T T T  
 2.043711 8.546929 5.239921 T T T  
 1.740781 10.048082 5.979728 T T T  
 7.341974 0.109761 11.081030 T T T  
 8.395198 0.347057 9.982932 T T T  
 8.972068 7.902246 10.788808 T T T  
 9.005580 6.575454 11.730467 T T T

1.888103 4.418253 4.551890 T T T  
 2.356275 2.920836 4.868315 T T T  
 1.940106 4.233611 6.873507 T T T  
 2.684062 5.027889 8.318839 T T T  
 3.044652 9.093979 6.930263 T T T  
 4.222973 8.113264 7.517743 T T T  
 4.938358 6.202205 7.662287 T T T  
 4.195273 4.601235 9.484854 T T T  
 6.589061 9.449995 7.071817 T T T  
 7.975226 9.136332 7.730687 T T T  
 5.882757 3.765800 10.760240 T T T  
 4.869412 2.707403 10.525936 T T T  
 1.223509 6.681596 10.879746 T T T

**The selective coordinates of the \*H adsorption at 0 V vs RHE on the MoN<sub>4</sub>/H<sub>2</sub>O interface during the SG- AIMG**

**At 0.65 ps**

Frame 650 extracted from XDATCAR

1.0  
 9.824384 0.0 0.0  
 0.0 12.762371 0.0  
 0.0 0.0 25.5  
 C N Mo O H  
 42 4 1 40 81  
 Direct  
 0.12170330 0.31902779 0.04095263  
 0.12286877 0.65275731 0.04205020  
 0.12433451 0.98599241 0.04273894  
 0.37050883 0.64812565 0.05190071  
 0.37502911 0.98665844 0.04713208  
 0.62662565 0.64812565 0.05190071  
 0.62210425 0.98665844 0.04713208  
 0.87542995 0.31902779 0.04095263  
 0.87426540 0.65275731 0.04205020  
 0.87279864 0.98599241 0.04273894  
 0.12289117 0.20775850 0.04214176  
 0.12172784 0.54144242 0.04089157  
 0.12433665 0.87453193 0.04270788  
 0.37053326 0.21237355 0.05197314  
 0.37500865 0.87387391 0.04710267  
 0.62660010 0.21237355 0.05197314  
 0.62212552 0.87387391 0.04710267  
 0.87424219 0.20775850 0.04214176  
 0.87540552 0.54144242 0.04089157  
 0.87279793 0.87453193 0.04270788  
 0.99856693 0.15210113 0.04118694  
 0.99856693 0.48543182 0.03793733  
 0.99856693 0.81974572 0.04190933  
 0.24862841 0.15363603 0.04551278  
 0.24346056 0.48654682 0.04794792  
 0.24972161 0.81868808 0.04476129  
 0.49856673 0.15832176 0.05229408  
 0.49856673 0.81565581 0.04898659  
 0.74850606 0.15363603 0.04551278  
 0.75367280 0.48654682 0.04794792  
 0.74741276 0.81868808 0.04476129

0.99856693 0.04077957 0.04196314  
 0.99856693 0.37503776 0.03797400  
 0.99856693 0.70842792 0.04110027  
 0.24973169 0.04180156 0.04481710  
 0.24344946 0.37398153 0.04797357  
 0.24864969 0.70687727 0.04543039  
 0.49856673 0.04486807 0.04904224  
 0.49856673 0.70218692 0.05221804  
 0.74740157 0.04180156 0.04481710  
 0.75368390 0.37398153 0.04797357  
 0.74848469 0.70687727 0.04543039  
 0.36177535 0.31960911 0.05808553  
 0.63535902 0.31960911 0.05808553  
 0.63534060 0.54092848 0.05803294  
 0.36179266 0.54092848 0.05803294  
 0.49545193 0.43193792 0.09383831  
 0.07251988 0.83539369 0.29910839  
 0.14334025 0.03400933 0.30198466  
 0.91038382 0.63721524 0.33021202  
 0.59961923 0.10547203 0.16860271  
 0.92814855 0.49782716 0.17626203  
 0.70520923 0.98186541 0.28513655  
 0.64287127 0.90367648 0.18949817  
 0.87674476 0.13977338 0.27603759  
 0.64247827 0.80386493 0.43761276  
 0.46268594 0.20945415 0.25759820  
 0.41746772 0.78288868 0.17658118  
 0.57852674 0.47726460 0.29728580  
 0.39154247 0.45691406 0.16506472  
 0.32068257 0.09015262 0.49606122  
 0.13645838 0.78556471 0.40202718  
 0.88220156 0.72869565 0.48170571  
 0.45747404 0.03253022 0.33887902  
 0.91238067 0.35514825 0.29317020  
 0.84864023 0.19565129 0.17127626  
 0.75323294 0.34264869 0.44513670  
 0.17090621 0.50463915 0.21152975  
 0.57797237 1.02830063 0.43904203  
 0.66295415 0.39331807 0.20423194  
 0.27822946 0.02495994 0.18772452  
 0.41581426 0.68604816 0.41306904  
 0.78992145 0.44663781 0.36156695  
 0.01253587 1.02239818 0.15034030  
 0.92455370 0.83765186 0.20069748

0.75600995 0.66246690 0.15855732  
0.13619970 0.02049615 0.42762825  
0.29741698 0.48924018 0.45085496  
0.25771723 0.70927662 0.25826433  
0.84231250 0.12671828 0.40138671  
1.05106173 0.52185913 0.49561409  
0.17968624 0.22134689 0.20504144  
0.17791720 0.35944998 0.27844662  
0.49673490 0.67889958 0.31199392  
0.40604437 0.39543998 0.36281836  
0.70000671 0.79761684 0.33433539  
0.44427218 0.25071335 0.44131142  
0.09813969 0.90705859 0.28857710  
0.08824718 0.82918794 0.33662962  
0.19435483 0.04715701 0.26924592  
0.06077977 0.07004380 0.29321119  
0.87845230 0.58099078 0.35471903  
-0.00053415 0.65550195 0.34515358  
0.61805858 0.02910250 0.16967574  
0.54525169 0.12614756 0.13705205  
0.86708731 0.45147873 0.19557044  
0.87595592 0.56249175 0.17462378  
0.61261132 0.99542117 0.30029260  
0.72528600 0.91672368 0.30544539  
0.65379807 0.90331035 0.22764906  
0.55688483 0.85859172 0.18290578  
0.80835874 0.08275225 0.28431166  
0.86031055 0.15688257 0.23933320  
0.56172902 0.76641933 0.43977350  
0.67987626 0.80103646 0.40091200  
0.50169659 0.16398815 0.22949308  
0.49774964 0.16745382 0.28616196  
0.37112361 0.78270776 0.14228829  
0.35086459 0.77245519 0.20462570  
0.69733618 0.46366716 0.34358981  
0.61477994 0.43584646 0.26658034  
0.45562348 0.45344814 0.19446865  
0.27242162 0.47825007 0.18939455  
0.30002527 0.10283419 0.53397090  
0.23851439 0.07009820 0.47741569  
0.07275471 0.76616044 0.43124150  
0.23176417 0.76222679 0.41019395  
0.91130829 0.78031190 0.51043491  
0.79153210 0.75424107 0.46797534  
0.50518173 0.01797811 0.37265538  
0.35734913 0.02692944 0.34640627  
0.01848770 0.35518678 0.29386211  
0.87713987 0.27783225 0.28854884  
0.83349585 0.26972913 0.15921905  
0.75569926 0.15859217 0.16914155  
0.66039279 0.32977934 0.45566917  
0.79500427 0.27875800 0.43164816  
0.06764889 0.49484686 0.19330477  
0.16697706 0.45511203 0.24423686  
0.60146168 0.95292162 0.43897114  
0.49823154 1.03553771 0.46217486  
0.63080520 0.41294508 0.16046732  
0.64134577 0.31741053 0.20917712  
0.35473283 -0.01261415 0.17518063  
0.19765875 0.01208348 0.16529685  
0.47502376 0.66990073 0.38329924  
0.36542871 0.61913381 0.41896564

0.85339003 0.39724202 0.33352132  
0.76482230 0.40725877 0.39387497  
0.97708791 0.95705440 0.16616900  
0.93804063 0.07676268 0.15212436  
0.94351952 0.83993649 0.23874608  
0.83052353 0.86571566 0.20350606  
0.65552841 0.66298795 0.15500866  
0.78248428 0.73093081 0.17210611  
0.05666888 0.05738410 0.41445270  
0.12647929 0.94849608 0.41545635  
0.35983754 0.46257864 0.47674322  
0.36375364 0.43165724 0.39197396  
0.22595915 0.64747561 0.24106351  
0.17911634 0.76251265 0.26921235  
0.77243815 0.08766772 0.41909237  
0.82644288 0.12704789 0.36437569  
1.01820991 0.59055766 0.50619535  
0.97160924 0.47825990 0.48600697  
0.09246465 0.18895091 0.20618564  
0.24599558 0.15973151 0.19927597  
0.19173070 0.29915680 0.25144821  
0.24638100 0.36783890 0.30651149  
0.40788166 0.69736910 0.29089861  
0.52580469 0.61649132 0.29448498  
0.50282833 0.44620413 0.31229451  
0.41236447 0.32507873 0.37810597  
0.61472496 0.75261391 0.32213569  
0.77781148 0.75043288 0.32194483  
0.51875001 0.19978379 0.43554448  
0.40256506 0.20390219 0.46995929  
0.20587258 0.50151425 0.46889996

### At 3.2 ps

Frame 1404 extracted from XDATCAR  
1.0  
9.824384 0.0 0.0  
0.0 12.762371 0.0  
0.0 0.0 25.5  
C N Mo O H  
42 4 1 40 81  
Direct  
0.12170330 0.31902779 0.04095263  
0.12286877 0.65275731 0.04205020  
0.12433451 0.98599241 0.04273894  
0.37050883 0.64812565 0.05190071  
0.37502911 0.98665844 0.04713208  
0.62662565 0.64812565 0.05190071  
0.62210425 0.98665844 0.04713208  
0.87542995 0.31902779 0.04095263  
0.87426540 0.65275731 0.04205020  
0.87279864 0.98599241 0.04273894  
0.12289117 0.20775850 0.04214176  
0.12172784 0.54144242 0.04089157  
0.12433665 0.87453193 0.04270788  
0.37053326 0.21237355 0.05197314  
0.37500865 0.87387391 0.04710267  
0.62660010 0.21237355 0.05197314  
0.62212552 0.87387391 0.04710267  
0.87424219 0.20775850 0.04214176  
0.87540552 0.54144242 0.04089157

0.87279793 0.87453193 0.04270788  
0.99856693 0.15210113 0.04118694  
0.99856693 0.48543182 0.03793733  
0.99856693 0.81974572 0.04190933  
0.24862841 0.15363603 0.04551278  
0.24346056 0.48654682 0.04794792  
0.24972161 0.81868808 0.04476129  
0.49856673 0.15832176 0.05229408  
0.49856673 0.81565581 0.04898659  
0.74850606 0.15363603 0.04551278  
0.75367280 0.48654682 0.04794792  
0.74741276 0.81868808 0.04476129  
0.99856693 0.04077957 0.04196314  
0.99856693 0.37503776 0.03797400  
0.99856693 0.70842792 0.04110027  
0.24973169 0.04180156 0.04481710  
0.24344946 0.37398153 0.04797357  
0.24864969 0.70687727 0.04543039  
0.49856673 0.04486807 0.04904224  
0.49856673 0.70218692 0.05221804  
0.74740157 0.04180156 0.04481710  
0.75368390 0.37398153 0.04797357  
0.74848469 0.70687727 0.04543039  
0.36177535 0.31960911 0.05808553  
0.63535902 0.31960911 0.05808553  
0.63534060 0.54092848 0.05803294  
0.36179266 0.54092848 0.05803294  
0.49545193 0.43193792 0.09383831  
0.12856804 0.74021410 0.28939129  
0.22593605 0.94864459 0.31421947  
0.87739292 0.58857858 0.38463693  
0.70274126 0.05731088 0.16781868  
0.94842621 0.35743680 0.17999539  
0.70401121 0.91215525 0.32872652  
0.66927868 0.90472441 0.22655199  
0.95985242 0.08061766 0.30496935  
0.72982629 0.82153845 0.46027934  
0.59121320 0.22105763 0.20757067  
0.50127956 0.78084447 0.18651430  
0.61126487 0.41529275 0.30397127  
0.38660860 0.44568294 0.15938706  
0.26957934 -0.02617790 0.52920222  
0.10846838 0.70445503 0.38817426  
0.10239915 0.87412122 0.43517538  
0.47316184 0.03722796 0.36942639  
0.02430397 0.26399999 0.32884736  
0.95769297 0.13872696 0.20391445  
0.79687040 0.31951821 0.45841593  
0.15923390 0.45001313 0.20793368  
0.52830625 -0.00412537 0.47387353  
0.68794334 0.40221201 0.21074311  
0.32041291 0.98348019 0.21040453  
0.34530679 0.60566966 0.41543306  
0.82198807 0.38182741 0.36414627  
0.09866073 0.91442054 0.17038396  
0.92496305 0.78023100 0.21650538  
0.71075876 0.64396146 0.17172144  
0.10865384 0.16511286 0.52260646  
0.19321363 0.28812454 0.41605816  
0.32828374 0.65443149 0.22768962  
0.87125340 -0.02837729 0.41823985  
0.03400489 0.38262876 0.48561543

0.32899318 0.17702998 0.18714924  
0.26934797 0.29165918 0.27447154  
0.49200116 0.59160988 0.32655318  
0.44898100 0.26798452 0.35379775  
0.68862244 0.72378798 0.37326479  
0.80824479 0.12824660 0.48237960  
0.16959234 0.80926804 0.29590775  
0.11476798 0.72258241 0.32876947  
0.27660435 0.96828920 0.28465820  
0.14285449 -0.00721222 0.31372392  
0.87288642 0.50263669 0.37027228  
0.96913663 0.63370146 0.38886071  
0.68808651 0.99099769 0.19394078  
0.65733198 0.04211418 0.13282242  
0.79182522 0.39883375 0.20746690  
0.94080124 0.36858180 0.14300082  
0.62087992 0.94982628 0.34257645  
0.69509454 0.83729791 0.34219799  
0.67611478 0.90327933 0.26569636  
0.60073442 0.84600668 0.21015359  
0.88959335 0.02478617 0.30901512  
0.96120640 0.09520675 0.26615435  
0.76044919 0.77254954 0.48452598  
0.70595465 0.77670733 0.42693754  
0.64481068 0.15979787 0.18942927  
0.49493291 0.21930649 0.19980014  
0.56804134 0.73096443 0.17176218  
0.42444894 0.73732416 0.20434180  
0.73984498 0.40468405 0.33977435  
0.64216719 0.40193214 0.26475682  
0.42125915 0.43782894 0.19464294  
0.24231138 0.43684714 0.18077784  
0.26874279 -0.07521638 0.55741923  
0.23282031 0.03438199 0.54479526  
0.12042434 0.76745555 0.40915734  
0.18177303 0.65854346 0.40027042  
0.05336682 0.92570903 0.41586135  
1.11824553 0.90656114 0.46851538  
0.49411647 0.02782631 0.40630183  
0.38177804 0.00866645 0.36810476  
0.11085545 0.26841251 0.30684822  
-0.00859772 0.18740715 0.32610371  
-0.04997243 0.21352635 0.19906635  
0.86938292 0.12042738 0.18786601  
0.80911528 0.24066741 0.46211618  
0.89632748 0.34950071 0.47177617  
0.03524583 0.39756531 0.19013384  
0.18957241 0.41868360 0.24224273  
0.57463558 0.93419024 0.48017777  
0.44450100 -0.01477278 0.49487436  
0.62341156 0.43527338 0.14515429  
0.65635139 0.32559613 0.20959639  
0.39145431 0.94332172 0.19312357  
0.22056488 0.95630487 0.19509874  
0.40264085 0.58858633 0.38405466  
0.40502430 0.64203231 0.43851306  
0.89040860 0.33828056 0.34399035  
0.78468488 0.34124120 0.42271578  
0.02339187 0.87449625 0.18889626  
0.06280533 0.97664613 0.15551075  
0.98585971 0.76178795 0.24883324  
0.84935709 0.81971138 0.22967989

0.70829671 0.57194663 0.18431703  
0.80204829 0.67807720 0.18235080  
0.12002547 0.23493244 0.53598986  
0.01162913 0.16123085 0.51532685  
0.19973317 0.22133812 0.43322050  
0.37359369 0.29528713 0.37846910  
0.28507287 0.60063910 0.20912677  
0.25631885 0.68257766 0.25015117  
0.83666109 0.92057930 0.44263540  
0.80867378 -0.03867143 0.38701987  
0.10219781 0.34921905 0.45872615  
0.04514275 0.45892634 0.48209957  
0.25137794 0.19678008 0.16072449  
0.32672399 0.09924537 0.19355107  
0.29446032 0.24722267 0.24340956  
0.35519389 0.28647010 0.29490905  
0.44008414 0.60944040 0.29492487  
0.53186549 0.51964684 0.31637623  
0.55263707 0.35475189 0.31347015  
0.47842393 0.19652779 0.36233178  
0.60511989 0.68408670 0.35879765  
0.76614509 0.64774378 0.37634028  
0.81281792 0.07724024 0.45286729  
0.72231103 0.12202311 0.50014386  
0.14140712 0.27719622 0.38125248

## At 5.6 ps

Frame 158 extracted from XDATCAR

1.0  
9.824384 0.0 0.0  
0.0 12.762371 0.0  
0.0 0.0 25.5  
C N Mo O H  
42 4 1 40 81  
Direct  
0.12170330 0.31902779 0.04095263  
0.12286877 0.65275731 0.04205020  
0.12433451 0.98599241 0.04273894  
0.37050883 0.64812565 0.05190071  
0.37502911 0.98665844 0.04713208  
0.62662565 0.64812565 0.05190071  
0.62210425 0.98665844 0.04713208  
0.87542995 0.31902779 0.04095263  
0.87426540 0.65275731 0.04205020  
0.87279864 0.98599241 0.04273894  
0.12289117 0.20775850 0.04214176  
0.12172784 0.54144242 0.04089157  
0.12433665 0.87453193 0.04270788  
0.37053326 0.21237355 0.05197314  
0.37500865 0.87387391 0.04710267  
0.62660010 0.21237355 0.05197314  
0.62212552 0.87387391 0.04710267  
0.87424219 0.20775850 0.04214176  
0.87540552 0.54144242 0.04089157  
0.87279793 0.87453193 0.04270788  
0.99856693 0.15210113 0.04118694  
0.99856693 0.48543182 0.03793733  
0.99856693 0.81974572 0.04190933  
0.24862841 0.15363603 0.04551278

0.24346056 0.48654682 0.04794792  
0.24972161 0.81868808 0.04476129  
0.49856673 0.15832176 0.05229408  
0.49856673 0.81565581 0.04898659  
0.74850606 0.15363603 0.04551278  
0.75367280 0.48654682 0.04794792  
0.74741276 0.81868808 0.04476129  
0.99856693 0.04077957 0.04196314  
0.99856693 0.37503776 0.03797400  
0.99856693 0.70842792 0.04110027  
0.24973169 0.04180156 0.04481710  
0.24344946 0.37398153 0.04797357  
0.24864969 0.70687727 0.04543039  
0.49856673 0.04486807 0.04904224  
0.49856673 0.70218692 0.05221804  
0.74740157 0.04180156 0.04481710  
0.75368390 0.37398153 0.04797357  
0.74848469 0.70687727 0.04543039  
0.36177535 0.31960911 0.05808553  
0.63535902 0.31960911 0.05808553  
0.63534060 0.54092848 0.05803294  
0.36179266 0.54092848 0.05803294  
0.49545193 0.43193792 0.09383831  
0.09140269 0.69190568 0.29959032  
0.10848276 0.89794027 0.28109575  
0.82369121 0.55216313 0.39253356  
0.67081274 0.98959186 0.18309455  
0.86551873 0.33613332 0.18056106  
0.69187781 0.92320794 0.38903153  
0.53138338 0.90585713 0.25297884  
0.88309929 0.01135793 0.31433790  
0.47866011 0.73806318 0.43365079  
0.51228235 0.16700944 0.18138022  
0.41135624 0.73376408 0.19162734  
0.57708063 0.33158470 0.32359405  
0.38657977 0.40343419 0.15615163  
0.26082516 0.96703104 0.49600061  
0.06052012 0.65978734 0.39975784  
0.05816098 0.85345414 0.44302185  
0.34517630 1.00022550 0.32373338  
0.99273851 0.20063619 0.34045653  
0.85524777 0.10387489 0.22289839  
0.78764496 0.29651163 0.46707497  
0.14673049 0.41163079 0.20993981  
0.42835993 0.93094086 0.41067197  
0.62573213 0.32209090 0.23002806  
0.15448655 0.87749314 0.17856537  
0.29185344 0.57420292 0.43027525  
0.79240134 0.33251178 0.37473644  
0.86618213 0.82357132 0.16978640  
0.84101655 0.71832539 0.25803089  
0.68783426 0.63967995 0.16993470  
0.12996386 0.14417206 0.51864378  
0.16565849 0.25437482 0.41295259  
0.28887201 0.57257860 0.25291508  
0.78582882 0.92631527 0.49063129  
0.02474513 0.39903544 0.46972803  
0.14341992 0.11796508 0.18047326  
0.17209460 0.23736899 0.26562310  
0.42101201 0.51675019 0.34159933  
0.36941441 0.19744857 0.33966044  
0.64512570 0.67363415 0.34961099

0.86705979 0.09764158 0.53265578  
0.10575009 0.77009104 0.29036474  
0.06527817 0.66829802 0.36042982  
0.11032157 0.88708759 0.24121097  
0.03068146 0.94318564 0.29132212  
0.82364172 0.47923664 0.37421372  
0.91498887 0.57782340 0.39794509  
0.61142885 0.95319628 0.20976034  
0.74137281 0.92925869 0.17052396  
0.72105984 0.34016417 0.21236281  
0.84791993 0.36045206 0.14405738  
0.59294761 0.92988262 0.39674812  
0.69494764 0.85722501 0.36975328  
0.45727365 0.93242008 0.27482407  
0.48987181 0.84311474 0.23861239  
0.80665446 0.98810417 0.33853228  
0.84452797 0.05504976 0.28787444  
0.41689575 0.68045840 0.44202497  
0.53793392 0.70545854 0.40695642  
0.55104062 0.09634361 0.17784257  
0.42062219 0.16574628 0.16773149  
0.49982934 0.70892961 0.17746459  
0.37665506 0.66883129 0.21249978  
0.67786348 0.32580470 0.35058547  
0.60266288 0.33371244 0.28304429  
0.44468184 0.38893312 0.18896507  
0.21616104 0.41091110 0.18086058  
0.30570462 0.93394809 0.52653579  
0.20663550 0.03138457 0.50732816  
0.06521818 0.73586258 0.41170633  
0.19265012 0.60334579 0.42540545  
0.98594413 0.87351750 0.46841024  
0.13975712 0.88194322 0.45889571  
0.37417435 0.97898887 0.35663606  
0.26998199 0.96407125 0.30772343  
0.05668046 0.20942343 0.31077398  
0.95758220 0.13053039 0.33098850  
0.83519094 0.17537544 0.20973852  
0.77929232 0.05247837 0.20898277  
0.81027171 0.23196779 0.49156337  
0.86882093 0.35136781 0.48130906

## Input file used in calculation

### INCAR for the DFT calculation

Global Parameters

ALGO=Fast  
ISTART = 0  
ISPIN = 2  
ENCUT = 550  
PREC = Accurate  
LREAL= Auto

Electronic Relaxation

0.95424179 0.36854323 0.18721395  
0.15377512 0.34264418 0.22941948  
0.43106773 0.85070524 0.41521576  
0.37731421 0.96336191 0.44458664  
0.61544875 0.45070428 0.14354528  
0.58204248 0.25923704 0.21218913  
0.23215900 0.82850136 0.16928443  
0.06548111 0.85248839 0.16605997  
0.36157056 0.51556275 0.37540775  
0.30148544 0.55019710 0.46571108  
0.88016511 0.31156560 0.35359818  
0.79274391 0.30315455 0.41094485  
0.85302166 0.80300327 0.20650162  
0.81235873 0.76746229 0.14977331  
0.92975924 0.69056099 0.27553643  
0.78345302 0.72878528 0.28645416  
0.65633903 0.57436398 0.15737839  
0.73741344 0.63165279 0.20445301  
0.14655863 0.20602173 0.54466012  
0.02426872 0.13309088 0.52659813  
0.15318465 0.21337721 0.44690974  
0.31531288 0.20325752 0.37198079  
0.24160564 0.51283272 0.23715583  
0.16064672 0.64822498 0.27997849  
0.73605835 0.88046900 0.51680376  
0.73840076 0.91326093 0.45559503  
0.09552731 0.35784227 0.44829759  
0.04091387 0.47146375 0.47088990  
0.05766364 0.09482937 0.19047553  
0.19654797 0.05288874 0.17380811  
0.18272518 0.18037114 0.23846044  
0.25961439 0.24934973 0.28585607  
0.34608587 0.54575372 0.28391830  
0.47438179 0.44933971 0.34151599  
0.50316388 0.27402771 0.33320651  
0.37215578 0.11983355 0.33077739  
0.56231523 0.64157585 0.33693415  
0.71643026 0.61954592 0.36161313  
0.82534650 0.03510095 0.51872794  
0.82703983 0.10961702 0.56717893  
0.08924377 0.23175416 0.39101060

ISMear = 0  
SIGMA = 0.05  
EDIFF = 1E-05  
EDIFFG = -0.01  
NELM = 150  
NELMIN = 6

Ionic Relaxation  
NSW = 1000  
IBRION = 2  
ISIF = 2  
IVDW = 11

LSOL = .TRUE.  
EB\_K = 78  
LAMBDA\_D\_K = 3.04

### INCAR for the AIMD simulation

ISTART = 0  
IVDW= 11  
ICHARG = 2  
LREAL = Auto  
PREC = Accurate  
ENCUT = 400  
EDIFF = 1E-05  
NSW = 5000  
ISPIN = 2  
ISMEAR = 0  
EDIFFG = -0.05  
SIGMA = 0.05  
ISIF = 2

ALGO=VeryFast  
ISMEAR=0  
SIGMA=0.05  
IBRION=0  
POTIM=1.0  
TEBEG=300.00  
TEEND=300.00  
SMASS = 0  
MDALGO = 2  
NWRITE = 0  
NBLOCK =1  
LWAVE = .FALSE  
LCHARG = .FALSE

#### **INCAR for the constant potential AIMD slow growth in the acidic medium**

ISTART = 0  
IVDW= 11  
LREAL = Auto  
ICHARG = 2  
PREC = Accurate  
ENCUT = 400  
EDIFF = 1E-05  
NSW = 500  
ISIF = 2  
ISMEAR = 0  
EDIFFG = -0.05  
SIGMA = 0.05  
NELM = 120  
NELMIN = 4  
ALGO=VeryFast  
ISMEAR=0  
SIGMA=0.0516  
ISPIN=2  
IBRION=0  
POTIM=0.5

TEBEG=300.00  
TEEND=300.00  
SMASS = 0  
MDALGO = 2  
NWRITE = 0  
NBLOCK =1  
LWAVE = .FALSE  
LCHARG = .FALSE  
LBLUEOUT=.TRUE.  
INCREM = -0.0004  
# CP-VASP Parameters  
LCEP = .TRUE.  
NESHEME = 2  
CAP\_MAX = 2.0  
NEADJUST = 5  
TARGETMU = -4.6  
FERMICONVERGE = 0.01  
LSOL = .TRUE.  
EB\_K = 78  
LAMBDA\_D\_K = 3.04
